1 **KDM2B promotes cell viability by enhancing DNA damage response in canine**  
2 **hemangiosarcoma**

3 Kevin Christian M. Gulay<sup>1</sup>, Keisuke Aoshima<sup>1\*</sup>, Yuki Shibata<sup>2</sup>, Hironobu Yasui<sup>2</sup>, Qin Yan<sup>3</sup>,  
4 Atsushi Kobayashi<sup>1</sup> & Takashi Kimura<sup>1</sup>

5

6 <sup>1</sup> Laboratory of Comparative Pathology, Department of Clinical Sciences, Faculty of Veterinary  
7 Medicine, Hokkaido University, Sapporo, Hokkaido, 060-0818, Japan.

8 <sup>2</sup> Laboratory of Radiation Biology, Department of Applied Veterinary Sciences, Faculty of  
9 Veterinary Medicine, Hokkaido University, Sapporo, Hokkaido, 060-0818, Japan.

10 <sup>3</sup> Department of Pathology, Yale School of Medicine, New Haven, CT, USA.

11

12 \*Correspondence to Keisuke Aoshima, Laboratory of Comparative Pathology, Department of  
13 Clinical Veterinary Sciences, Faculty of Veterinary Medicine, Hokkaido University, Kita 18  
14 Nishi 9, Kita-ku, Sapporo, Hokkaido 060-0818, Japan: [k-aoshima@vetmed.hokudai.ac.jp](mailto:k-aoshima@vetmed.hokudai.ac.jp); Tel.  
15 +81-11-706-5193

16

17

18

## 19     **Abstract**

20             Epigenetic regulators have been implicated in tumorigenesis of many types of cancer;  
21     however, their roles in endothelial cell cancers such as canine hemangiosarcoma (HSA) have  
22     not been studied. In this study, we found that lysine-specific demethylase 2B (Kdm2b) was  
23     highly expressed in HSA cell lines compared to normal canine endothelial cells. Silencing of  
24     Kdm2b in HSA cells resulted to increased cell death *in vitro* compared to the scramble control  
25     by inducing apoptosis through the inactivation of the DNA repair pathways and accumulation of  
26     DNA damage. Similarly, doxycycline-induced Kdm2b silencing in tumor xenografts resulted to  
27     decreased tumor sizes compared to the scramble control. Furthermore, Kdm2b was also highly  
28     expressed in clinical cases of HSA, and its expression levels was higher than in hemangioma, a  
29     benign counterpart of HSA. Based on these results, we hypothesized that pharmacological  
30     Kdm2b inhibition can also induce HSA cell death and can be used as an alternative treatment for  
31     HSA. We treated HSA cells with GSK-J4, a histone demethylase inhibitor, and found that  
32     GSK-J4 treatment also induced apoptosis and cell death. On top of that, GSK-J4 treatment in  
33     HSA tumor-bearing mice decreased tumor sizes without any obvious side-effects. In this study,  
34     we demonstrated that Kdm2b acts as an oncogene in HSA by enhancing DNA damage response  
35     and can be used as a biomarker to differentiate HSA from hemangioma. Moreover, we indicated  
36     that histone demethylase inhibitor GSK-J4 can be used as a therapeutic alternative to  
37     doxorubicin for HSA treatment.

38

## 39     **Keywords**

40     DNA repair, epigenetics, hemangiosarcoma, KDM2B, oncogene

41

## 42     **Introduction**

43             Canine hemangiosarcoma (HSA) is a highly malignant tumor of vascular endothelial  
44     cells. It is an aggressive tumor with high rates of local recurrence and metastasis, and a low  
45     overall survival time<sup>1</sup>. Its high cellular heterogeneity has limited genomic and pathogenesis  
46     studies in HSA. Genomic analyses have revealed that HSA cells have somatic coding mutations  
47     in the *TP53*, *PIK3CA*, and *PIK3R1*. Furthermore, *CDKN2A/B* were found to be consistently  
48     deleted and copies of *VEGFA*, *KDR* and *KIT* were gained<sup>2</sup>. The oncogene involved in HSA,  
49     however, is still unknown.

50             Epigenetic mechanisms are essential for reproduction, embryonic development, and  
51     maintenance of normal cell function in eukaryotes<sup>3</sup>. Generally, the genetic alterations that cause  
52     tumorigenesis are combined with epigenetic shifts, such as aberrant DNA methylation and  
53     histone modifications, which may help oncogenic drivers improve cancer development,  
54     metastasis, and resistance to therapies<sup>4</sup>. KDM2B (also known as NDY1 and FBXL10), an  
55     H3K4me3, H3K36me2/3 and H3K79me3 demethylase, acts as a tumor suppressor in gastric  
56     cancer by downregulating glycolysis, and tumor-derived mutation in Kdm2b enhances cell  
57     proliferation through the inability of c-FOS degradation<sup>5</sup>. Alternatively, KDM2B can also act as  
58     an oncogene in various types of cancers. In leukemia, Kdm2b is highly expressed and is  
59     sufficient to transform hematopoietic progenitor cells<sup>6</sup>. In breast cancer, KDM2B regulates

60 polycomb complexes and controls self-renewal of breast cancer stem cells<sup>7</sup>. This bifunctional  
61 activity means that the role of KDM2B in tumors is highly context dependent and must be  
62 evaluated carefully<sup>8</sup>. While epigenetics is highly involved in pathogenesis of many cancers, its  
63 role in HSA is still unknown.

64 Treatment of HSA is carried out by tumor excision and chemotherapy with  
65 doxorubicin, cisplatin, or 5-fluorouracil<sup>9,10</sup>. The mean survival time for surgical treatment is 3  
66 months while the mean survival time for surgical treatment with chemotherapy is less than a  
67 year<sup>11,12</sup>. Chemotherapeutic drugs fail to improve survival times of cancer patients due to the  
68 non-specificity of their cytotoxic effects in the cardiomyocytes, brain, liver and intestine<sup>13,14</sup>. A  
69 more effective, specific, and safer treatment for HSA is warranted.

70 Histone demethylase inhibitors are effective agents for anticancer treatment. In a  
71 previous study, GSK-J4, a histone demethylase inhibitor, decreased AML disease progression by  
72 downregulating DNA replication and cell cycle-related pathways through the enrichment of  
73 H3K27me3<sup>15</sup>. GSK-J4 was initially developed as a KDM6 inhibitor, but it was found to inhibit  
74 the catalytic activity of a wide range of JmjC domain-containing histone demethylases including  
75 KDM2B<sup>16</sup>. Epigenetic therapy may provide additional treatment option, but no epigenetic drug  
76 has tested for HSA.

77 In this study, we sought to establish the pathogenesis and to find a therapeutic

78 alternative for HSA by examining the role of epigenetic regulators.

79

## 80 **Results**

### 81 **Kdm2b is important for HSA cell survival**

82 We first performed RNA-sequencing analysis of canine aortic endothelial cells  
83 (CnAOEC) and one HSA cell line, JuB2, to examine the expression levels of epigenetic  
84 modifiers. Among the differentially expressed genes, histone methyltransferases/demethylases,  
85 histone acetyltransferases/deacetylases, and DNA methyltransferase/demethylases were  
86 dysregulated in JuB2 compared to CnAOEC (Fig. 1A, Supplementary Fig. 1A). Next, we  
87 performed qRT-PCR to verify RNA-seq results of histone methyltransferases/demethylases in  
88 CnAOEC and seven HSA cell lines. Some histone methyltransferases were incoherently  
89 expressed in HSA cell lines compared to CnAOEC (Supplementary Fig. 1B). In contrast, three  
90 histone demethylases were significantly upregulated in HSA cells compared to CnAOEC.  
91 Moreover, one set of paralogs (*KDM2A* and *KDM2B*) were enriched, which implies their  
92 importance in HSA (Fig. 1B). We then performed western blotting for Kdm1a, Kdm2a, and  
93 Kdm2b and found that their protein levels were upregulated in all HSA cell lines compared to  
94 CnAOEC (Fig. 1C and D). To provide further evidence, we performed qRT-PCR analysis in  
95 ISO-HAS-B, a human angiosarcoma cell line, compared to Human Umbilical Vein Endothelial

96 Cells (HUVEC). We revealed that histone methyltransferases/demethylases were also  
 97 dysregulated in ISO-HAS-B (Supplementary Fig. 1C and Fig. 1E). Furthermore, protein  
 98 expression levels of KDM1A, KDM2A and KDM2B were also upregulated in ISO-HAS-B  
 99 compared to HUVEC (Fig. 1F and G). These results suggest that epigenetic regulators,  
 100 specifically Kdm1a, Kdm2a, and Kdm2b, are highly expressed in HSA and human  
 101 angiosarcoma and, thus, may have a significant role in endothelial cell tumors.

102         To examine whether the overexpression of Kdm1a, Kdm2a and Kdm2b has important  
 103 functional roles in HSA, we designed three shRNA sequences for each gene to knockdown  
 104 *KDM1A*, *KDM2A* and *KDM2B* as well as two scramble RNA controls (scrRNA), and we  
 105 expressed these shRNAs in HSA cell lines using a doxycycline (Dox)-inducible vector system.  
 106 Knockdown was verified with western blotting after four days of Dox treatment (Fig. 2A).  
 107 Knockdown of *KDM1A* and *KDM2A* did not have short term effects in JuB2 viability, whereas  
 108 knockdown of *KDM2B* markedly decreased JuB2 viability within 4 days (Fig. 2B). To evaluate  
 109 long term effects of Kdm1a, Kdm2a and Kdm2b on JuB2 cell survival, we performed colony  
 110 formation assay and found that *KDM1A* and *KDM2A* knockdown could inhibit JuB2 colony  
 111 formation, whereas *KDM2B* knockdown significantly reduced the number of colonies of JuB2  
 112 (Fig. 2C and D, Supplementary Fig. 2A and B). Kdm2b knockdown with constitutively  
 113 expressed shRNA vectors also induced the same phenotype in JuB2 cells and other HSA cell

lines such as JuB4, Re21, and Ud6 (Supplementary Fig. 2C and D). These results suggest that Kdm2b is an important histone demethylase in HSA cell survival, which encouraged us to further investigate its function. To examine whether Kdm2b can alter overall histone methylation levels in HSA, we performed western blotting for histone methylations that can be modified by Kdm2b. However, all possible histone methylations were not affected in JuB2 after *KDM2B* knockdown (Supplementary Fig. 2E). Next, to investigate which Kdm2b domain is responsible for HSA cell viability, we rescued Kdm2b function in *KDM2B* silenced HSA cells. We expressed wild type (WT) canine Kdm2b with silent mutations for the sequences which were targeted by the shRNAs and Kdm2b mutants with a point mutation for the JmjC domain (Kdm2b<sup>H283Y</sup>), the CXXC domain (Kdm2b<sup>C586A</sup>), or with PHD-finger domain deleted (Kdm2b<sup>ΔPHD</sup>)<sup>17-19</sup>. Overexpression of WT Kdm2b and Kdm2b<sup>C586A</sup> mutant but not the Kdm2b<sup>H283Y</sup> or the Kdm2b<sup>ΔPHD</sup> mutants rescued the phenotype (Fig. 2E), which suggests that the JmjC and the PHD-finger domains are important for the Kdm2b function in HSA.

To verify our *in vitro* results and to know the effect of Kdm2b silencing *in vivo*, JuB2 cells with Dox-inducible shRNAs against *KDM2B* or the scramble shRNA were injected subcutaneously into nude mice and the tumor volumes over time were measured. Dox-containing food pellets were provided to the mice to induce shRNA expression when the largest tumor reached 150 mm<sup>3</sup> in volume. Tumor xenografts started to decrease in volume four

132 days after induction of Kdm2b silencing, moreover, half of the xenografts bearing shKDM2B-A  
133 and one out of eight xenografts bearing shKDM2B-C completely regressed 10 days  
134 post-induction (Fig 3A and B). At the endpoint, tumor xenografts with silenced Kdm2b were  
135 significantly smaller compared with the xenografts overexpressing the scramble RNA control  
136 (Fig. 3C). We also xenografted JuB2 cells expressing the silencing vector for Kdm1a or Kdm2a.  
137 Although tumor volume repression was initially observed post-doxycycline treatment, tumor  
138 regrowth was observed 10 post-doxycycline treatment signifying that other histone  
139 demethylases or proteins can rescue Kdm1a or Kdm2a function *in vivo* or some cell populations  
140 were not affected by their knockdown (Fig. 3A).

141 These results suggest that Kdm2b is important for HSA cell survival both *in vitro* and  
142 *in vivo* and its local catalytic activity is responsible for the phenotype.

143

#### 144 **KDM2B knockdown induces apoptosis via accumulation of DNA damages**

145 To understand the mechanisms by which Kdm2b regulates HSA cell survival, we  
146 performed RNA-seq followed by gene set enrichment analyses (GSEA) in JuB2 cells expressing  
147 shKDM2B-A versus JuB2 cells expressing scrRNA-1. Silencing of Kdm2b showed negative  
148 correlations with angiogenesis and glycolysis pathways, which might reflect decreased HSA cell  
149 viability (Supplementary Fig. 3A). Interestingly, expressions of genes downregulated in



150 response to ultraviolet (UV) radiation (HALLMARK\_UV\_RESPONSE\_DN) were decreased  
151 by Kdm2b knockdown (Fig. 4A). Considering this correlation and the fact that UV response can  
152 trigger DNA damage response<sup>20</sup>, we speculated that DNA damage might be related to *KDM2B*  
153 knockdown phenotypes. This speculation was further supported by positive enrichment of the  
154 G2M checkpoint pathway and the interferon response pathway, which has been reported to be  
155 associated with mitochondrial and nuclear DNA damage (Supplementary Fig. 3A)<sup>21-24</sup>. These  
156 results were validated by qRT-PCR (Fig. 4B, Supplementary Fig. 3B to E). To further dissect the  
157 mechanism, we examined the expression levels of proteins involved in DNA repair pathway.  
158 Total Atm, c-Fos, and  $\gamma$ H2A.X expressions were upregulated in HSA cell lines compared to  
159 CnAOEC and their expressions were significantly decreased by *KDM2B* knockdown (Fig 4C  
160 and D). Phosphorylated-Atm (pAtm), an active form of Atm, was also decreased by *KDM2B*  
161 knockdown. Next, we carried out alkaline comet assay to detect DNA strand breaks in HSA cell  
162 lines upon *KDM2B* silencing. Our results showed that *KDM2B* silencing drastically increased  
163 tail DNA percentages, tail lengths, and tail momentums compared to the scramble control (Fig.  
164 4E and F). Furthermore, flow cytometry analysis using propidium iodide (PI) revealed that JuB2  
165 with silenced *KDM2B* increased aneuploid peaks although parental HSA cells also showed  
166 aneuploidy (Fig 5A and B, Supplementary Fig. 4A and B). In contrast, overexpression of WT  
167 Kdm2b in JuB2 HSA cells resulted to significantly decreased aneuploid cell population

168 compared to empty vector (EV) expressing JuB2 cells (Fig 5C and D). In addition, active  
169 apoptosis markers, cleaved-caspase 3, Bax and phosphorylated Erk1/2, were increased in cells  
170 with silenced *KDM2B* compared to the scramble control cells (Fig 5E). Furthermore, CnAOEC  
171 overexpressing WT Kdm2b continued proliferating beyond day 20 while the EV expressing  
172 CnAOEC showed decreased cell proliferation and cell death starting at day 11 (Fig 5F). In  
173 addition, Kdm2b overexpression decreased the phosphorylation of Erk1/2 proteins at day 19  
174 post-lentiviral Kdm2b overexpression (Fig. 5G and H) and repressed mRNA expressions of cell  
175 cycle checkpoint genes such as *p15<sup>ink4b</sup>*, *p16<sup>ink4a</sup>*, and *ATR* (Fig. 5I). These results suggest that  
176 *KDM2B* knockdown in HSA cells induces cell death via apoptosis caused by accumulation of  
177 DNA damages due to low expression of proteins involved in DNA repair.

178

### 179 **Kdm2b is highly expressed in clinical cases of HSA**

180 We demonstrated that Kdm2b upregulation was important for HSA cell survival, but  
181 Kdm2b expression in clinical HSA cases has not been investigated. To this end, we analyzed  
182 seventeen clinical cases of HSA and compared the immunohistochemical Kdm2b expression  
183 between HSA cells and normal endothelial cells in the same sample. Our results showed that  
184 Kdm2b was highly expressed in HSA cells compared to normal endothelial cells in almost all  
185 the cases examined regardless of proliferation patterns or degree of differentiation (Fig 6A and

186 B). The average Kdm2b score in HSA cells was significantly higher than that in normal  
187 endothelial cells (Fig. 6C). We then also examined the benign endothelial tumor, hemangioma  
188 (HMA), for Kdm2b expression. Interestingly, Kdm2b expression levels in hemangioma cells  
189 were likely lower than normal endothelial cells in the same sample (Fig. 6D to F,  $p=0.096$ ). The  
190 average Kdm2b expression scores in HSA were significantly higher than in HMA cells when the  
191 average Kdm2b scores in tumor cells were normalized to normal endothelial cells in the same  
192 slides (Fig. 6G). Kdm2b expressions were also analyzed in histologically-similar tumors,  
193 hemangiopericytoma (HPC), melanoma, and fibrosarcoma cells. Results showed that HPC,  
194 melanoma, and fibrosarcoma cells had similar Kdm2b expression compared to normal  
195 endothelial cells in the same slide (Supplementary Fig. 5A to C). These results suggest that  
196 Kdm2b expresses in clinical HSA samples and can be used as a biomarker to differentiate HSA  
197 and HMA. In addition, Kdm2b may also be used as a molecular marker to differentiate HSA  
198 from HPC, melanoma, and fibrosarcoma.

199

## 200 **GSK-J4 inhibits HSA cell viability**

201 We demonstrated that KDM2B inhibition through shRNA could induce HSA cell death.  
202 Based on this, we hypothesized that pharmacological Kdm2b inhibition could also induce HSA  
203 cell death. To test this hypothesis, we treated HSA cell lines with different concentrations of

204 GSK-J4 and compared it to doxorubicin-treated cells. GSK-J4 inhibited HSA cell viability at a  
205 lower concentration in JuB2, JuB4, and Ud6 cell lines compared to doxorubicin (Fig. 7A). HSA  
206 cell lines treated with GSK-J4 have higher expressions of cleaved-caspase 3 compared to HSA  
207 cells treated with doxorubicin. In contrast, GSK-J4 treated HSA cells have decreased t-Atm and  
208  $\gamma$ H2A.X expression compared to HSA cells treated with DMSO control (Fig.7B).

209 To determine whether GSK-J4 can be used as an alternative drug for HSA treatment,  
210 we treated nude mice harboring JuB2 tumors with DMSO, GSK-J4 or doxorubicin. GSK-J4  
211 treatment significantly decreased the tumor growth over time and tumor weights at the endpoint  
212 compared to DMSO treatment (Fig 7C-E). Although Doxorubicin treatment also led to  
213 decreased tumor growth, it had significant toxicity and led to 83% mortality in 21 days (Fig. 7F).  
214 In contrast, GSK-J4 did not induce any death during the treatment period. Body and liver  
215 weights decreased in doxorubicin-treated mice compared to DMSO or GSK-J4 treated mice  
216 (Fig. 7G, Supplementary Fig. 6A). In addition, increased hematopoiesis in bone marrow, a sign  
217 of myelosuppression, and dilation of intestines were only observed in mice treated with  
218 doxorubicin (Supplementary Fig. 6B and C). These results suggest that GSK-J4 can selectively  
219 inhibit HSA cell growth by inducing HSA cell apoptosis without any obvious side-effects. Thus,  
220 GSK-J4 could be used as a therapeutic alternative to doxorubicin for HSA treatment.

221

## 222 Discussion

223 To our knowledge this is the first study which evaluated the role of epigenetic  
 224 regulators in HSA. We demonstrated that Kdm2b upregulation in HSA cell lines and clinical  
 225 samples is important for HSA cell survival by regulating DNA damage repair and apoptosis.  
 226 There are three possible reasons for the high expression of Kdm2b in HSA. Firstly, *KDM2B*  
 227 upstream regulators may be dysregulated. In bladder cancer, the upregulation of fibroblast  
 228 growth factor-2 upregulated the KDM2B/EZH2-miR-101 pathway and promoted tumor cell  
 229 proliferation, survival, and migration<sup>25</sup>. In squamous cell and cervical carcinomas, increased  
 230 copy number of *MYC* resulted to increased KDM2B expression<sup>26</sup>. Secondly, the *KDM2B* gene  
 231 itself may have acquired increased copy numbers. We demonstrated that parental HSA cell lines  
 232 contain an aneuploid cell population. Since cell aneuploidy can cause genomic instability as a  
 233 result of decreased DNA damage repair activity<sup>27</sup>, some genes including *KDM2B* in HSA might  
 234 have increased copy numbers. Lastly, *KDM2B* might be upregulated to compensate for DNA  
 235 damage and to integrate genetic stability in HSA genomes. As we mentioned above, flow  
 236 cytometry analysis revealed multiple aneuploid peaks in HSA cell lines. Aneuploidy has also  
 237 been reported in clinical cases of HSA and in HSA cell lines, which implies that HSA cells are  
 238 subject to high level cellular stress<sup>28–30</sup>. In such conditions, HSA cells may bypass cell death  
 239 caused by accumulated cellular stresses through modulation of gene expression. We showed that

240 knockdown of Kdm2b in HSA cell lines decreased DNA repair protein expressions and  
241 increased DNA damage. In contrast, exogenous expression of Kdm2b in JuB2 and in CnAOEC  
242 increased euploid population and inhibited apoptosis, respectively. Kdm2b may ease cellular  
243 stress caused by DNA damage in endothelial cells by regulating the DNA repair system.

244 KDM2B and other histone demethylases are known to have a double-edged function  
245 in cancer<sup>8,31</sup>. A study showed that KDM2B suppresses tumorigenesis in gastric cancer by  
246 enhancing c-Fos degradation, and that impairment of KDM2B through patient-derived  
247 mutations enhances tumor cell proliferation<sup>32</sup>. In contrast, several studies showed that  
248 degradation of c-FOS by KDM2B in prostate cancer and glioblastoma multiforme can increase  
249 cancer cell resistance to chemotherapy<sup>33,34</sup>. In HSA, we showed that positive regulation of these  
250 genes by Kdm2b can enhance HSA cellular viability in contrast to a previous report where  
251 KDM2B was shown to promote colon cancer cell survival by negatively regulating DNA  
252 damage response-related genes such as ATM and ATR<sup>35</sup>. These contrasting evidences support  
253 the role of KDM2B in DNA damage response and suggest that the role of KDM2B in DNA  
254 damage response in cancer cells is highly context dependent.

255 We have presented various evidences which demonstrate the role of Kdm2b as an  
256 oncogene in HSA by regulating DNA repair system and apoptosis, and that Kdm2b can be used  
257 as a biomarker to aid HSA diagnosis. We also demonstrated that a histone demethylase inhibitor

258 GSK-J4 can work as a new therapeutic alternative to doxorubicin treatment in HSA. These  
259 findings shed light on the epigenetic pathology and provides a new insight for a novel therapy in  
260 HSA.

261

## 262 **Materials and Methods**

### 263 **Cell culture**

264 The HSA cell lines were donated by Dr. Sakai (Gifu University)<sup>36</sup> and cultured as  
265 described previously<sup>37</sup>. CnAOEC was purchased from Cell Applications (CA, USA), and  
266 ISO-HAS-B was received from Cell Resource Center for Biomedical Research Cell Bank in  
267 Tohoku University (Sendai, Japan)<sup>38</sup>. Both CnAOEC and ISO-HAS-B were cultured in  
268 Endothelial Cell Growth Medium 2 Kit (Takara Bio, Inc. Kusatsu, Japan). All cells used were  
269 routinely tested for *Mycoplasma* using PCR and were submitted to ICLAS Monitoring Center  
270 (Kawasaki, Japan) for Mouse hepatitis virus testing<sup>39,40</sup>.

271

### 272 **Mice**

273 All mouse experiments were performed under the AAALAC guidelines in Yale  
274 University (protocol number: 2018-11286) and Hokkaido University (protocol number:19-0130).  
275 Seven-week old female Balb/c Nude mice purchased from Charles River Laboratories (MA,

USA) were used for *KDM2B* knockdown experiments. Six-week-old KSN/Slc mice purchased from Japan SLC, Inc. (Shizuoka, Japan) were used for drug treatment experiments. Mice were kept in a temperature-controlled specific-pathogen-free facility on a 12 hr light/dark cycle. Animals in all experimental groups were examined at least twice weekly for tumorigenesis.

280

# **Tumor xenograft studies**

A day before tumor inoculation, KSN/Slc mice were treated with 100  $\mu$ L of 2.5 mg/mL anti-asialo GM1 (Fujifilm Wako Pure Chemical Industries, Osaka, Japan) to increase the success rate of transplantation by depleting NK cells<sup>41</sup>. JuB2 parental HSA cells and JuB2 cells expressing the shRNAs or the scramble shRNA for *KDM2B* in the presence of doxycycline were cultured in 15 cm dishes without doxycycline. Mice were randomly assigned in each group. Three million HSA cells were resuspended in Corning<sup>®</sup> Matrigel<sup>®</sup> Basement Membrane Matrix (Corning Inc. NY, USA) and inoculated subcutaneously in mice anesthetized with 3% isoflurane or 100 mg/kg Ketamine and 10 mg/kg Xylazine. Tumor sizes were measured twice weekly one week after inoculation. When the largest tumor reached 150 mm<sup>3</sup> in volume, mice were fed doxycycline-containing food to induce shRNA expression, or treated thrice weekly for three weeks with 50 mg/kg DMSO, 50 mg/kg GSK-J4 (Medchemexpress, NJ, USA), or 5 mg/kg doxorubicin (Fujifilm Wako Pure Chemical Industries) intraperitoneally. Mice were euthanized



294 with CO<sub>2</sub> when tumors reached 500 mm<sup>3</sup> in volume or when mice exhibited abnormal behavior.  
295 Tumors and major organs were weighed and fixed in 10% neutral buffered formalin for  
296 histological examination.

297

## 298 **Western Blotting**

299 SDS lysis buffer (2% SDS, 50 mM Tris-HCl (pH6.8), 1mM EDTA (pH 8.0)) with  
300 EDTA-free proteinase inhibitor cocktail (Sigma-Aldrich, MO, USA) was added in cultured cells.  
301 Cell lysates were then sonicated using BRANSON Sonifier 450 (Branson Ultrasonics  
302 Corporation, CT, USA) for two secs. Protein concentrations were measured with the Pierce™  
303 BCA Protein Assay Kit (Thermo Fisher Scientific) before adding 4X Sample loading buffer  
304 (200 mM Tris-HCl buffer (pH 6.8), 8% SDS, 40% Glycerol, 1% bromophenol blue, 20%  
305 2-mercaptoethanol) and denaturing at 98°C for 10 mins. 3 µg proteins were separated by  
306 SDS-PAGE and electrotransferred onto Immobilon®-P transfer membranes (Merck Millipore,  
307 MA, USA), blocked with 5% skim milk in Tris-buffered saline with 5% Tween 20 (TBST), or  
308 5% BSA in TBST for one hour at room temperature (RT) and incubated with primary antibody  
309 in Can Get Signal Solution® 1 (TOYOBO, Osaka, Japan) overnight at 4°C. The membranes  
310 were washed with TBST three times before incubating with the corresponding secondary  
311 anti-mouse or anti-rabbit IgG antibody (GE Healthcare) in Can Get Signal Solution® 2

312 (TOYOBO). Signals were developed with Immobilon<sup>®</sup> Western Chemiluminescent HRP  
313 substrate (Merck Millipore) and visualized in ImageQuant LAS 4000 mini luminescent image  
314 analyzer (GE Healthcare). Captured data were processed using ImageJ software<sup>42</sup>. The list of  
315 antibodies used in this study can be found as Supplementary Table 1.

316

### 317 **Quantitative RT-PCR (qRT-PCR)**

318 Total RNA was extracted with Nucleospin<sup>®</sup> RNA isolation kit (Macherey-Nagel  
319 GmbH & Co. Düren, Germany) following the manufacturer's instructions. Synthesis of cDNA  
320 was performed using the PrimeScript<sup>™</sup> Reverse Transcriptase (Takara Bio, Inc.) according to  
321 the manufacturer's instructions. qRT-PCR was performed with StepOne<sup>™</sup> Real Time System  
322 (Thermo Fisher Scientific). The oligos for qRT-PCR were designed as described elsewhere<sup>37,43</sup>,  
323 and listed within Supplementary Table 2.

324

### 325 **RNA-sequencing**

326 CnAOEC or JuB2 HSA cells were cultured in 10 cm dishes in triplicate. Upon  
327 reaching 80% confluency, RNA was extracted with Nucleospin<sup>®</sup> RNA isolation kit  
328 (Macherey-Nagel GmbH & Co.) following the manufacturer's instructions. RNA samples were  
329 submitted to Annoroad (Beijing, China) for further analyses. Quality testing was carried by

330 measuring RNA integrity (RIN), OD<sub>260/280</sub> and OD<sub>260/230</sub>. All samples had an RIN of 9.3 or better  
331 and OD readings were within the range of 1.8-2.2. RNA-seq libraries were constructed using  
332 NEBNext® Ultra RNA Library Prep Kit for Illumina® (New England Biolabs, MA, USA) and  
333 sequenced with the Illumina HiSeq X-Ten platform (Illumina, CA, USA) to generate a  
334 minimum of 20 million paired-end 150 bp reads. Sequencing reads were mapped to the canine  
335 reference genome CanFam3.1 using STAR and aligned using RSEM<sup>44,45</sup>. Differential expression  
336 analyses were carried out using edgeR<sup>46</sup>, and gene expression profiles were analyzed by GSEA  
337 v4.03<sup>47,48</sup>. The gene set database of h. all. v7.1. symbols. gmt (Hallmarks) was used.

338

### 339 **shRNA vector construction**

340 The shRNAs used in this study were designed using the Hannon lab shRNA design  
341 tool ([http://hannonlab.cshl.edu/GH\\_shRNA.html](http://hannonlab.cshl.edu/GH_shRNA.html), Cold Spring Harbor Laboratory). Oligos were  
342 inserted to pLKO.1-TRC or pInducer10-mir-RUP-PheS vector, a gift from David Root  
343 (Addgene plasmid # 10878; <http://n2t.net/addgene:10878>; RRID:Addgene\_10878)<sup>49</sup> and from  
344 Stephen Elledge (Addgene plasmid # 44011; <http://n2t.net/addgene:44011>; RRID:Addgene  
345 44011)<sup>50</sup>, respectively. shRNA expressions were induced by supplementing 2 µM doxycycline in  
346 the culture medium. The list of oligonucleotide sequences used for shRNA knockdown can be  
347 found as Supplementary Table 3.

348

## 349 **Overexpression vector construction**

350           The coding sequence of canine *KDM2B* (ENSCAFT00000093772.1) was cloned from  
351 cDNA synthesized from canine heart. Mutant Kdm2b (H283Y, C586A, ΔPHD) were  
352 synthesized as described elsewhere<sup>15,51</sup>. The amplicon tagged with FLAG sequences at its 3' end  
353 was ligated into CSII-CMV-MCS-IRES2-Bsd vector, a gift from Dr. Miyoshi (RIKEN  
354 BioResource Center, Ibaraki, Japan), with In-Fusion<sup>®</sup> HD Cloning Kit (Takara Bio, Inc.)  
355 according to the manufacturer's instruction. The list of oligonucleotide sequences used for CDS  
356 cloning are can be found as Supplementary Table 4.

357

## 358 **Lentivirus production**

359           Lentiviruses were produced following a protocol described elsewhere with a slight  
360 modification that virus containing culture medium was used without concentration<sup>37</sup>. Selection  
361 of positive clones were done by culturing of cells in 10 µg/ml blasticidin- or 4 µg/ml  
362 puromycin-containing cell medium.

363

## 364 **Alkaline comet assay**

365           JuB2 overexpressing shRNA for *KDM2B* or scrRNA were cultured in

366 doxycycline-containing medium for four days.  $4 \times 10^4$  cells were used for alkaline comet assay  
367 as described previously. 20  $\mu\text{g/mL}$  PI was used for staining and the comets were visualized with  
368 BZ-9000 (BIOREVO) fluorescence microscope (Keyence, Osaka, Japan). Experiments were  
369 performed at least three times with triplicates.

370

### 371 **Cell cycle analysis**

372 When HSA cells reach 70% confluency, they were stained with 1  $\mu\text{L}$  of 0.1M BrdU for  
373 45 mins at  $37^\circ\text{C}$ . Cells were washed with phosphate-buffered saline (PBS) and trypsinized  
374 routinely. The cells were fixed in 70% ethanol overnight and washed with 0.5% Triton X-100 in  
375 PBS (PBST) before resuspending the cells in 500  $\mu\text{L}$  of 2N HCl-0.5% Triton X-100 for 30 mins  
376 at RT and neutralizing with 500  $\mu\text{L}$  of 0.1M  $\text{Na}_2\text{B}_4\text{O}_7 \cdot 10\text{H}_2\text{O}$  (pH 8.5) for 30 mins at RT. After  
377 blocking with 1% BSA-0.3% Triton X-100 in PBS for 1 hr and washing with PBST, cells were  
378 counted and divided into two tubes;  $2.5 \times 10^5$  cells were used as controls and incubated in the  
379 blocking buffer while  $6 \times 10^5$  cells were incubated with anti-BrdU monoclonal antibody (1:100;  
380 MOBU-1 clone, B35128, Thermo Fisher Scientific) for 1 hr at RT. Excess primary antibodies  
381 were washed before staining with AlexaFluor 488 (1:1000; Thermo Fisher Scientific). DNA was  
382 stained with 10  $\mu\text{g}/200 \mu\text{L}$  Propidium Iodide (Dojindo Molecular Technologies, Inc., Kumamoto,  
383 Japan). Cell cycle and cell proliferation were analyzed in BD FACSVerse™ flow cytometer (BD

384 Biosciences, NJ, USA). Results were analyzed with FCS Express 4 software (De Novo  
385 Software, CA, USA). Experiments were performed at least three times with triplicates.

386

### 387 **Cell viability analysis**

388 Cell viability was measured with Cell Counting Kit-8 (Dojindo Molecular  
389 Technologies, Inc.) according to the manufacturer's instructions. The absorbance at 450 nm was  
390 measured with NanoDrop™ 2000 (Thermo Fisher Scientific). Determination of IC<sub>50</sub> were  
391 performed using Ky Plot 6.0 software (KyensLab, Inc., Tokyo, Japan) as described elsewhere<sup>52</sup>.  
392 Experiments were performed at least three times with triplicates.

393

### 394 **Colony formation assay**

395 500 HSA cells were seeded in 6-well culture plates containing 2 mL normal medium  
396 supplemented with DMSO or 2 µM doxycycline. Cells were cultured until the largest colony  
397 reached 2 mm in diameter. Cells were fixed with 4% paraformaldehyde for 20 mins at RT,  
398 stained with 0.01% Crystal Violet (Sigma-Aldrich, MO, USA) for 30 mins at RT, and the  
399 images were captured with ChemiDoc XRS Plus (Bio-rad, CA, USA). Colony areas were  
400 measured using ColonyArea plugin for ImageJ<sup>42,53</sup>. Experiments were performed at least three  
401 times with triplicates.

402

### 403 **Histopathology and immunohistochemistry (IHC)**

404           Written informed consents were obtained from the owners of the patient dogs, and the  
405 samples were used only for research purposes. Hematoxylin and eosin staining was performed  
406 as described previously<sup>54</sup>. For IHC, tissue sections were deparaffinized, and heat-induced  
407 antigen retrieval was performed in citric acid buffer (pH 6.8) with a pressure cooker.  
408 Endogenous peroxidases were quenched with 0.3% H<sub>2</sub>O<sub>2</sub> in methanol for 15 min at RT before  
409 blocking the tissue sections with 10% normal rabbit serum (Nichirei biosciences, Tokyo, Japan)  
410 for an hour at RT and incubating with KDM2B antibody (sc-293279, 1:50, Santa Cruz  
411 Biotechnology, CA, USA) overnight at 4°C. Slides were washed with 0.01M PBS before  
412 incubating with rabbit anti-mouse antibody (Nichirei biosciences) for 30 min at RT. Signals  
413 were developed with 3,3'-diaminobenzidine tetrahydrochloride (DAB; Dojindo).

414

### 415 **Quantification of IHC scores**

416           Histological slides were scanned with Nano Zoomer 2.0-RS (Hamamatsu Photonics,  
417 Hamamatsu, Japan) and processed in QuPath ver 0.2.1<sup>55</sup>. Scanned slides were opened as  
418 Brightfield (H-DAB) in QuPath, and staining colors were automatically adjusted using Estimate  
419 Stain Vectors function. Healthy tumor regions or normal blood vessels were randomly selected,

420 and cells were detected using Cell Detection function. Cells were annotated based on their  
421 morphologies and location to allow QuPath to automatically classify each cell type correctly  
422 using the Create Detection Classifiers function. The measured data was exported and used for  
423 further analysis. We used Nuclear: DAB OD max scores for quantitative analysis because  
424 Kdm2b signals were found only in heterochromatin regions in nuclei but they had abundant  
425 euchromatin region. Furthermore, nonspecific signals from fibrin and erythrocytes were often  
426 misinterpreted as nuclear or cytoplasmic signals especially in normal endothelial cells, thus, to  
427 make the analysis as precise as possible, we decided to use max intensities in the nuclei.

428

## 429 **Statistical analysis**

430 Statistical analyses were performed with Microsoft Excel and R software (version  
431 3.6.3). Student's *t*-tests was used to analyze difference between two groups while the Tukey's  
432 test was used to analyze differences between multiple groups. The significance of the  
433 differences in tumor volumes of DMSO, GSK-J4 or doxorubicin-treated mice were compared  
434 using Dunnet's test while their survival post-treatment were compared using Log-rank test.  
435 *p*-values less than 0.05 were considered statistically significant.

436

## 437 **Acknowledgements**



438           We are grateful to Dr. Osamu Ichii, Dr. Junpei Yamazaki, and Dr. Noboru Sasaki for  
439           their invaluable support during the conduct of the study. We appreciate useful discussions with  
440           the members of the Laboratory of Comparative Pathology, Faculty of Veterinary Medicine,  
441           Hokkaido University, and the members of Yan laboratory, Department of Pathology, Yale  
442           School of Medicine. This research was supported by the Sasagawa Scientific Research Grant for  
443           Young Researchers (KG, Research No. 2019-4111) provided by the Japan Science Society and  
444           the KAKENHI Grant-in-Aid for Young Scientist (KA, Number 18K14575 and 20K15654)  
445           provided by Japan Society for the Promotion of Science.

446

#### 447   **Availability of data and materials**

448           The RNA sequence data will be deposited in NCBI's Gene Expression Omnibus. All  
449           other data supporting the findings of this study can be found within the supplementary files.

450

#### 451   **Competing interests**

452           The authors declare no competing interests.

453

#### 454   **Author contributions**

455           KG and KA designed the experiments. KG performed in vitro experiments. KG and KA

456 performed in vivo experiments. YS and HY assisted with the comet assay. KA analyzed the  
457 RNA-sequencing data and performed other bioinformatics analyses. KG and KA were  
458 responsible for the statistical analyses. QY, AK and TK supervised the experiments. KG and KA  
459 wrote the paper.

# References

- 1 Kim J-H, Graef AJ, Dickerson EB, Modiano JF. Pathobiology of Hemangiosarcoma in Dogs: Research Advances and Future Perspectives. *Vet Sci* 2015; **2**: 388–405.
- 2 Megquier K, Turner-Maier J, Swofford R, Kim J-H, Sarver AL, Wang C *et al*. Comparative Genomics Reveals Shared Mutational Landscape in Canine Hemangiosarcoma and Human Angiosarcoma. *Mol Cancer Res* 2019; **17**: 2410–2421.
- 3 Sharma S, Kelly TK, Jones PA. Epigenetics in cancer. *Carcinogenesis* 2010; **31**: 27–36.
- 4 Moosavi A, Motevalizadeh Ardekani A. Role of Epigenetics in Biology and Human Diseases. *Iran Biomed J* 2016; **20**: 246–258.
- 5 Hong X, Xu Y, Qiu X, Zhu Y, Feng X, Ding Z *et al*. MiR-448 promotes glycolytic metabolism of gastric cancer by downregulating KDM2B. *Oncotarget* 2016; **7**: 22092–22102.
- 6 He J, Nguyen AT, Zhang Y. KDM2b/JHDM1b, an H3K36me2-specific demethylase, is required for initiation and maintenance of acute myeloid leukemia. *Blood* 2011; **117**: 3869–3880.
- 7 Kottakis F, Foltopoulou P, Sanidas I, Keller P, Wronski A, Dake BT *et al*. NDY1/KDM2B functions as a master regulator of polycomb complexes and controls self-renewal of breast cancer stem cells. *Cancer Res* 2014; **74**: 3935–3946.
- 8 Yan M, Yang X, Wang H, Shao Q. The critical role of histone lysine demethylase KDM2B in cancer. *Am J Transl Res* 2018; **10**: 2222–2233.
- 9 Sorenmo KU, Baez JL, Clifford CA, Mauldin E, Overley B, Skorupski K *et al*. Efficacy and Toxicity of a Dose-Intensified Doxorubicin Protocol in Canine Hemangiosarcoma. *J Vet Intern Med* 2004; **18**: 209–213.
- 10 Clifford CA, Mackin AJ, Henry CJ. Treatment of Canine Hemangiosarcoma: 2000 and Beyond. *J Vet Intern Med* 2000; **14**: 479–485.
- 11 Brown NO, Patnaik AK, MacEwen EG. Canine hemangiosarcoma: retrospective analysis of 104 cases. *J Am Vet Med Assoc* 1985; **186**: 56–58.

- 489 12 Batschinski K, Nobre A, Vargas-Mendez E, Tedardi MV, Cirillo J, Cestari G *et al*.  
490 Canine visceral hemangiosarcoma treated with surgery alone or surgery and  
491 doxorubicin: 37 cases (2005-2014). *Can Vet J Rev Veterinaire Can* 2018; **59**:  
492 967–972.
- 493 13 Carvalho C, Santos R, Cardoso S, Correia S, Oliveira P, Santos M *et al*. Doxorubicin:  
494 The Good, the Bad and the Ugly Effect. *Curr Med Chem* 2009; **16**: 3267–3285.
- 495 14 Odom AL, Hatwig CA, Stanley JS, Benson AM. Biochemical determinants of  
496 adriamycin® toxicity in mouse liver, heart and intestine. *Biochem Pharmacol* 1992;  
497 **43**: 831–836.
- 498 15 Li Y, Zhang M, Sheng M, Zhang P, Chen Z, Xing W *et al*. Therapeutic potential of  
499 GSK-J4, a histone demethylase KDM6B/JMJD3 inhibitor, for acute myeloid  
500 leukemia. *J Cancer Res Clin Oncol* 2018; **144**: 1065–1077.
- 501 16 Heinemann B, Nielsen JM, Hudlebusch HR, Lees MJ, Larsen DV, Boesen T *et al*.  
502 Inhibition of demethylases by GSK-J1/J4. *Nature* 2014; **514**: E1–E2.
- 503 17 Wang T, Chen K, Zeng X, Yang J, Wu Y, Shi X *et al*. The Histone Demethylases  
504 Jhdmla/lb Enhance Somatic Cell Reprogramming in a Vitamin-C-Dependent  
505 Manner. *Cell Stem Cell* 2011; **9**: 575–587.
- 506 18 Tzatsos A, Pfau R, Kampranis SC, Tschlis PN. Ndy1/KDM2B immortalizes mouse  
507 embryonic fibroblasts by repressing the Ink4a/Arf locus. *Proc Natl Acad Sci* 2009;  
508 **106**: 2641–2646.
- 509 19 Zhou Q, Zhang Y, Wang B, Zhou W, Bi Y, Huai W *et al*. KDM2B promotes IL-6  
510 production and inflammatory responses through Brg1-mediated chromatin  
511 remodeling. *Cell Mol Immunol* 2020; **17**: 834–842.
- 512 20 Stokes MP, Rush J, Macneill J, Ren JM, Sprott K, Nardone J *et al*. Profiling of  
513 UV-induced ATM/ATR signaling pathways. *Proc Natl Acad Sci U S A* 2007; **104**:  
514 19855–19860.
- 515 21 Brzostek-Racine S, Gordon C, Scoy SV, Reich NC. The DNA Damage Response  
516 Induces IFN. *J Immunol* 2011; **187**: 5336–5345.
- 517 22 Mboko WP, Mounce BC, Wood BM, Kulinski JM, Corbett JA, Tarakanova VL.  
518 Coordinate Regulation of DNA Damage and Type I Interferon Responses Imposes

519 an Antiviral State That Attenuates Mouse Gammaherpesvirus Type 68 Replication  
520 in Primary Macrophages. *J Virol* 2012; **86**: 6899–6912.

521 23 Chen J, Harding SM, Natesan R, Tian L, Benci JL, Li W *et al* Cell Cycle  
522 Checkpoints Cooperate to Suppress DNA- and RNA-Associated Molecular Pattern  
523 Recognition and Anti-Tumor Immune Responses. *Cell Rep* 2020; **32**.  
524 doi:10.1016/j.celrep.2020.108080.

525 24 Tigano M, Vargas DC, Fu Y, Tremblay-Belzile S, Sfeir A. Nuclear sensing of  
526 mitochondrial DNA breaks enhances immune surveillance. *bioRxiv* 2020; :  
527 2020.01.31.929075.

528 25 Kottakis F, Polytarchou C, Foltopoulou P, Sanidas I, Kampranis SC, Tsiachlis PN.  
529 FGF-2 regulates cell proliferation, migration, and angiogenesis through an  
530 NDY1/KDM2B-miR-101-EZH2 pathway. *Mol Cell* 2011; **43**: 285–298.

531 26 Peta E, Sinigaglia A, Masi G, Di Camillo B, Grassi A, Trevisan M *et al* HPV16 E6  
532 and E7 upregulate the histone lysine demethylase KDM2B through the  
533 c-MYC/miR-146a-5p axis. *Oncogene* 2018; **37**: 1654–1668.

534 27 Sheltzer JM, Blank HM, Pfau SJ, Tange Y, George BM, Humpton TJ *et al*.  
535 Aneuploidy Drives Genomic Instability in Yeast. *Science* 2011; **333**: 1026–1030.

536 28 Fosmire SP, Dickerson EB, Scott AM, Bianco SR, Pettengill MJ, Meylemans H *et al*  
537 Canine malignant hemangiosarcoma as a model of primitive angiogenic  
538 endothelium. *Lab Invest* 2004; **84**: 562–572.

539 29 Thomas R, Borst L, Retroff D, Motsinger-Reif A, Lindblad-Toh K, Modiano JF *et al*.  
540 Genomic profiling reveals extensive heterogeneity in somatic DNA copy number  
541 aberrations of canine hemangiosarcoma. *Chromosome Res Int J Mol Supramol Evol*  
542 *Asp Chromosome Biol* 2014; **22**: 305–319.

543 30 Zhu J, Tsai H-J, Gordon MR, Li R. Cellular Stress Associated with Aneuploidy. *Dev*  
544 *Cell* 2018; **44**: 420–431.

545 31 Kozub MM, Carr RM, Lomberg GL, Fernandez-Zapico ME. LSD1, a double-edged  
546 sword, confers dynamic chromatin regulation but commonly promotes aberrant cell  
547 growth. *F1000Research* 2017; **6**: 2016.

548 32 Han X-R, Zha Z, Yuan H-X, Feng X, Xia Y-K, Lei Q-Y *et al*. KDM2B/FBXL10 targets

549 c-Fos for ubiquitylation and degradation in response to mitogenic stimulation.  
550 *Oncogene* 2016; **35**: 4179–4190.

551 33 Kurt IC, Sur I, Kaya E, Cingoz A, Kazancioglu S, Kahya Z *et al*. KDM2B, an  
552 H3K36-specific demethylase, regulates apoptotic response of GBM cells to TRAIL.  
553 *Cell Death Dis* 2017; **8**: e2897.

554 34 Ge R, Wang Z, Zeng Q, Xu X, Olumi AF. F-box protein 10, an NF- $\kappa$ B-dependent  
555 anti-apoptotic protein, regulates TRAIL-induced apoptosis through modulating  
556 c-Fos/c-FLIP pathway. *Cell Death Differ* 2011; **18**: 1184–1195.

557 35 Chen L, Fu L, Kong X, Xu J, Wang Z, Ma X *et al*. Jumonji domain-containing  
558 protein 2B silencing induces DNA damage response via STAT3 pathway in  
559 colorectal cancer. *Br J Cancer* 2014; **110**: 1014–1026.

560 36 Murai A, Asa SA, Kodama A, Hirata A, Yanai T, Sakai H. Constitutive  
561 phosphorylation of the mTORC2/Akt/4E-BP1 pathway in newly derived canine  
562 hemangiosarcoma cell lines. *BMC Vet Res* 2012; **8**: 128.

563 37 Aoshima K, Fukui Y, Gulay KCM, Erdemsurakh O, Morita A, Kobayashi A *et al*.  
564 Notch2 signal is required for the maintenance of canine hemangiosarcoma cancer  
565 stem cell-like cells. *BMC Vet Res* 2018; **14**: 301.

566 38 Masuzawa M, Fujimura T, Hamada Y, Fujita Y, Hara H, Nishiyama S *et al*.  
567 Establishment of a human hemangiosarcoma cell line (ISO-HAS). *Int J Cancer*  
568 1999; **81**: 305–308.

569 39 Harasawa R, Mizusawa H, Fujii M, Yamamoto J, Mukai H, Uemori T *et al*. Rapid  
570 detection and differentiation of the major mycoplasma contaminants in cell cultures  
571 using real-time PCR with SYBR Green I and melting curve analysis. *Microbiol*  
572 *Immunol* 2005; **49**: 859–863.

573 40 Harasawa R, Mizusawa H, Nozawa K, Nakagawa T, Asada K, Kato I. Detection and  
574 tentative identification of dominant mycoplasma species in cell cultures by  
575 restriction analysis of the 16S-23S rRNA intergenic spacer regions. *Res Microbiol*  
576 1993; **144**: 489–493.

577 41 Yoshino H, Ueda T, Kawahata M, Kobayashi K, Ebihara Y, Manabe A *et al*. Natural  
578 killer cell depletion by anti-asialo GM1 antiserum treatment enhances human

579 hematopoietic stem cell engraftment in NOD/Shi<sup>-</sup> scid mice. *Bone Marrow*  
580 *Transplant* 2000; **26**: 1211–1216.

581 42 Schneider CA, Rasband WS, Eliceiri KW. NIH Image to ImageJ: 25 years of image  
582 analysis. *Nat Methods* 2012; **9**: 671–675.

583 43 Peters IR, Peeters D, Helps CR, Day MJ. Development and application of multiple  
584 internal reference (housekeeper) gene assays for accurate normalisation of canine  
585 gene expression studies. *Vet Immunol Immunopathol* 2007; **117**: 55–66.

586 44 Dobin A, Davis CA, Schlesinger F, Drenkow J, Zaleski C, Jha S *et al*. STAR:  
587 ultrafast universal RNA-seq aligner. *Bioinformatics* 2013; **29**: 15–21.

588 45 Li B, Dewey CN. RSEM: accurate transcript quantification from RNA-Seq data with  
589 or without a reference genome. *BMC Bioinformatics* 2011; **12**: 323.

590 46 Robinson MD, McCarthy DJ, Smyth GK. edgeR: a Bioconductor package for  
591 differential expression analysis of digital gene expression data. *Bioinformatics*  
592 2010; **26**: 139–140.

593 47 Mootha VK, Lindgren CM, Eriksson K-F, Subramanian A, Sihag S, Lehar J *et al*.  
594 PGC-1 $\alpha$ -responsive genes involved in oxidative phosphorylation are  
595 coordinately downregulated in human diabetes. *Nat Genet* 2003; **34**: 267–273.

596 48 Subramanian A, Tamayo P, Mootha VK, Mukherjee S, Ebert BL, Gillette MA *et al*.  
597 Gene set enrichment analysis: A knowledge-based approach for interpreting  
598 genome-wide expression profiles. *Proc Natl Acad Sci* 2005; **102**: 15545–15550.

599 49 Moffat J, Grueneberg DA, Yang X, Kim SY, Kloepper AM, Hinkle G *et al*. A  
600 Lentiviral RNAi Library for Human and Mouse Genes Applied to an Arrayed Viral  
601 High-Content Screen. *Cell* 2006; **124**: 1283–1298.

602 50 Meerbrey KL, Hu G, Kessler JD, Roarty K, Li MZ, Fang JE *et al*. The pINDUCER  
603 lentiviral toolkit for inducible RNA interference in vitro and in vivo. *Proc Natl Acad*  
604 *Sci USA* 2011; **108**: 3665–3670.

605 51 Zhou Z, Yang X, He J, Liu J, Wu F, Yu S *et al*. Kdm2b Regulates Somatic  
606 Reprogramming through Variant PRC1 Complex-Dependent Function. *Cell Rep*  
607 2017; **21**: 2160–2170.

608 52 Morita A, Aoshima K, Gulay KCM, Onishi S, Shibata Y, Yasui H *et al*. High drug  
609 efflux pump capacity and low DNA damage response induce doxorubicin resistance  
610 in canine hemangiosarcoma cell lines. *Res Vet Sci* 2019; **127**: 1–10.

611 53 Guzmán C, Bagga M, Kaur A, Westermarck J, Abankwa D. ColonyArea: An ImageJ  
612 Plugin to Automatically Quantify Colony Formation in Clonogenic Assays. *PLOS*  
613 *ONE* 2014; **9**: e92444.

614 54 Maharani A, Aoshima K, Onishi S, Gulay KCM, Kobayashi A, Kimura T. Cellular  
615 atypia is negatively correlated with immunohistochemical reactivity of CD31 and  
616 vWF expression levels in canine hemangiosarcoma. *J Vet Med Sci* 2018; **80**:  
617 213–218.

618 55 Bankhead P, Loughrey MB, Fernández JA, Dombrowski Y, McArt DG, Dunne PD *et*  
619 *al*. QuPath: Open source software for digital pathology image analysis. *Sci Rep*  
620 2017; **7**: 16878.

621



## 622 **Figure legends**

623

### 624 **Fig. 1 Epigenetic regulators are dysregulated in endothelial cell tumors.**

625 **A**, Transcripts per million (TPM) scores of histone demethylases in CnAOEC and JuB2 HSA  
626 cell line. **B**, qRT-PCR verification of select histone demethylases in CnAOEC and HSA cell  
627 lines. **C**, Western blotting for Kdm1a, Kdm2a, and Kdm2b in CnAOEC and HSA cell lines. **D**,  
628 Quantitative analysis of Kdm1a, Kdm2a, and Kdm2b protein expressions in CnAOEC and HSA  
629 cell lines. **E**, qRT-PCR analysis of *KDM1A*, *KDM2A*, and *KDM2B* mRNA expressions in  
630 HUVEC and ISO-HAS-B. **F**, Western blotting for KDM1A, KDM2A, and KDM2B in HUVEC  
631 and ISO-HAS-B. **G**, Quantitative analysis of KDM1A, KDM2A, and KDM2B protein  
632 expressions in HUVEC and ISO-HAS-B. Data are presented as mean values  $\pm$  s.d. \* $p$  <0.05  
633 \*\* $p$ <0.01 \*\*\* $p$ <0.001, Student's *t*-test; <sup>c</sup> $p$ <0.001, Tukey's test.

634

### 635 **Fig. 2 Kdm2b is important for HSA cell survival *in vitro*.**

636 **A**, Western blotting of Kdm1a, Kdm2a, or Kdm2b to verify the silencing efficiency of shRNA  
637 vectors developed for Kdm1a, Kdm2a, and Kdm2b. **B**, Cell viability analysis after the induction  
638 of the inducible shRNA vector using doxycycline. **C**, Colony formation assay of JuB2 cells after  
639 Kdm1a, Kdm2a, or Kdm2b silencing. **D**, Quantitative analysis of **C**. **E**, Cell viability analysis

640 after rescue overexpression of WT Kdm2b, or dominant negative mutants for the JmjC  
641 (Kdm2b<sup>H283Y</sup>), CxxC (Kdm2b<sup>C586A</sup>), or PHD (Kdm2b<sup>ΔPHD</sup>) domains. Data are presented as mean  
642 values ± s.d. \*\*\**p*<0.001, Two-way ANOVA.

643

644 **Fig. 3 Kdm2b is important in HSA cell survival *in vivo*.**

645 **A**, Tumor growth at different time points before and after the induction of the shRNA  
646 expression in JuB2 cells inoculated in nude mice. \*\*\**p*<0.001, two-way ANOVA with Dunnett's  
647 post-hoc test for tumor volumes after starting doxycycline treatments (arrow). **B and C**, Tumor  
648 sizes and weights of tumors harboring scramble RNA or shRNA for Kdm1a, Kdm2a, or Kdm2b  
649 78 days after tumor transplantation. Scale = 1 cm. \*\**p*<0.01 \*\*\**p*<0.001, Dunnett's test. Data  
650 are presented as mean values ± s.d.

651

652 **Fig. 4 Kdm2b positively regulates DNA repair pathway.**

653 **A**, GSEA enrichment plot for UV\_Response\_DN in shKDM2B-A versus scrRNA-1. **B**,  
654 qRT-PCR verification of gene expressions listed in UV\_Response\_DN gene set. **C and D**,  
655 Western blotting for Atm, c-Fos, and γH2A.X in normal endothelial cells and HSA cell lines (**C**)  
656 and in JuB2 cells expressing shRNA control or shKDM2B (**D**). **E**, Representative images of  
657 alkaline comet assays in scrRNA or shKDM2B JuB2 cells. **F**, Tail DNA percentages, lengths,

658 and momentums of JuB2 HSA cells harboring scrRNA or shRNA for Kdm2b. Data are  
659 presented as mean values  $\pm$  s.d. \*\*\* $p$ <0.001, Tukey's test.

660

661 **Fig. 5 Kdm2b regulates aneuploidy and apoptosis in HSA.**

662 **A**, Histograms of PI intensities in scrRNA and shKDM2B JuB2 cells. **B**, Percentages of  
663 aneuploid cells in shRNA and shKDM2B JuB2 cells. \*\*\* $p$ <0.001, Tukey's test. **C**, Histograms  
664 of PI intensities in EV infected JuB2 cells and WT Kdm2b JuB2 cells. **D**, Percentages of  
665 aneuploid cells in EV JuB2 and WT Kdm2b JuB2. \*\*\* $p$ <0.001, Student- $t$  test. **E**, Western  
666 blotting for cleaved-caspase 3, Bax and Erk 1/2 in JuB2 HSA cells expressing scrRNA controls  
667 or shKDM2B RNAs. **F**, Phase contrast images of CnAOEC cells infected with EV or  
668 overexpressing WT Kdm2b at day 1 and day 19. Scale = 100  $\mu$ m. **G**, Western blotting of Erk 1/2  
669 in CnAOEC infected with EV or overexpressing WT Kdm2b. **H**, Quantification of Kdm2b and  
670 phosphorylated Erk 1/2 expression in EV infected or WT Kdm2b expressing CnAOEC  
671 normalized with Actin and total Erk 1/2, respectively. **I**, qRT-PCR analysis of cell cycle related  
672 genes after overexpression of WT Kdm2B in normal endothelial cells. Data are presented as  
673 mean values  $\pm$  s.d. \*\* $p$ <0.01 \*\*\* $p$ <0.001, Student's  $t$ -test.

674

675 **Fig. 6 Kdm2b can be used as a differential biomarker for HSA.**

676 **A**, Representative images of hematoxylin-eosin staining (HE) and immunohistochemistry (IHC)  
677 for clinical HSA samples. Proliferation patterns are indicated with case numbers. Scale = 100  
678  $\mu\text{m}$ . **B**, Max nuclear DAB intensities in individual endothelial cells (EC) and tumor cells  
679 (Tumor) of each HSA case. **C**, Average max nuclear DAB intensities of EC and tumor cells in  
680 each HSA case. **D**, Representative HE and IHC images of hemangioma (HMA), a benign  
681 endothelial cell tumor. Scale = 100  $\mu\text{m}$ . **E**, Max nuclear DAB intensities in individual EC and  
682 tumor cells of each HMA case. **F**, Average max nuclear DAB intensities of EC and tumor cells  
683 in each HMA case. **G**, Comparison of relative Kdm2b intensity of HSA and HMA cells  
684 normalized by normal endothelial cells in their respective slides. Data are presented as mean  
685 values  $\pm$  s.d.  $**p < 0.01$ , Student's *t*-test.

686

687 **Fig. 7 GSK-J4 inhibits HSA cell proliferation *in vitro* and *in vivo*.**

688 **A**, Survival rates and  $\text{IC}_{50}$  values of GSK-J4 or doxorubicin-treated HSA cell lines. **B**, Western  
689 blotting for  $\gamma\text{H2A.X}$ , Atm and cleaved-caspase 3 in HSA cells treated with GSK-J4 or  
690 doxorubicin. **C**, Tumor growth curves of JuB2 HSA cell xenografts in nude mice. Treatment  
691 with DMSO, GSK-J4, or doxorubicin started at day 45 (arrow). n indicates the number of mice.  
692  $**p < 0.01$ , two-way ANOVA with Dunnett's post-hoc test. **D**, Gross images of collected tumors  
693 at day 64. n indicates the number of collected tumors. **E**, Tumor weights of DMSO, GSK-J4, or

694 doxorubicin-treated nude mice at necropsy. **F**, Kaplan-Meier survival curves of DMSO, GSK-J4,  
695 or doxorubicin-treated nude mice after starting treatments.  $**p < 0.01$ , Log-rank test. **G**, Body  
696 weights of DMSO, GSK-J4, or doxorubicin-treated nude mice at necropsy. Data are presented  
697 as mean values  $\pm$  s.d.  $**p < 0.01$ , Tukey's test.  
698

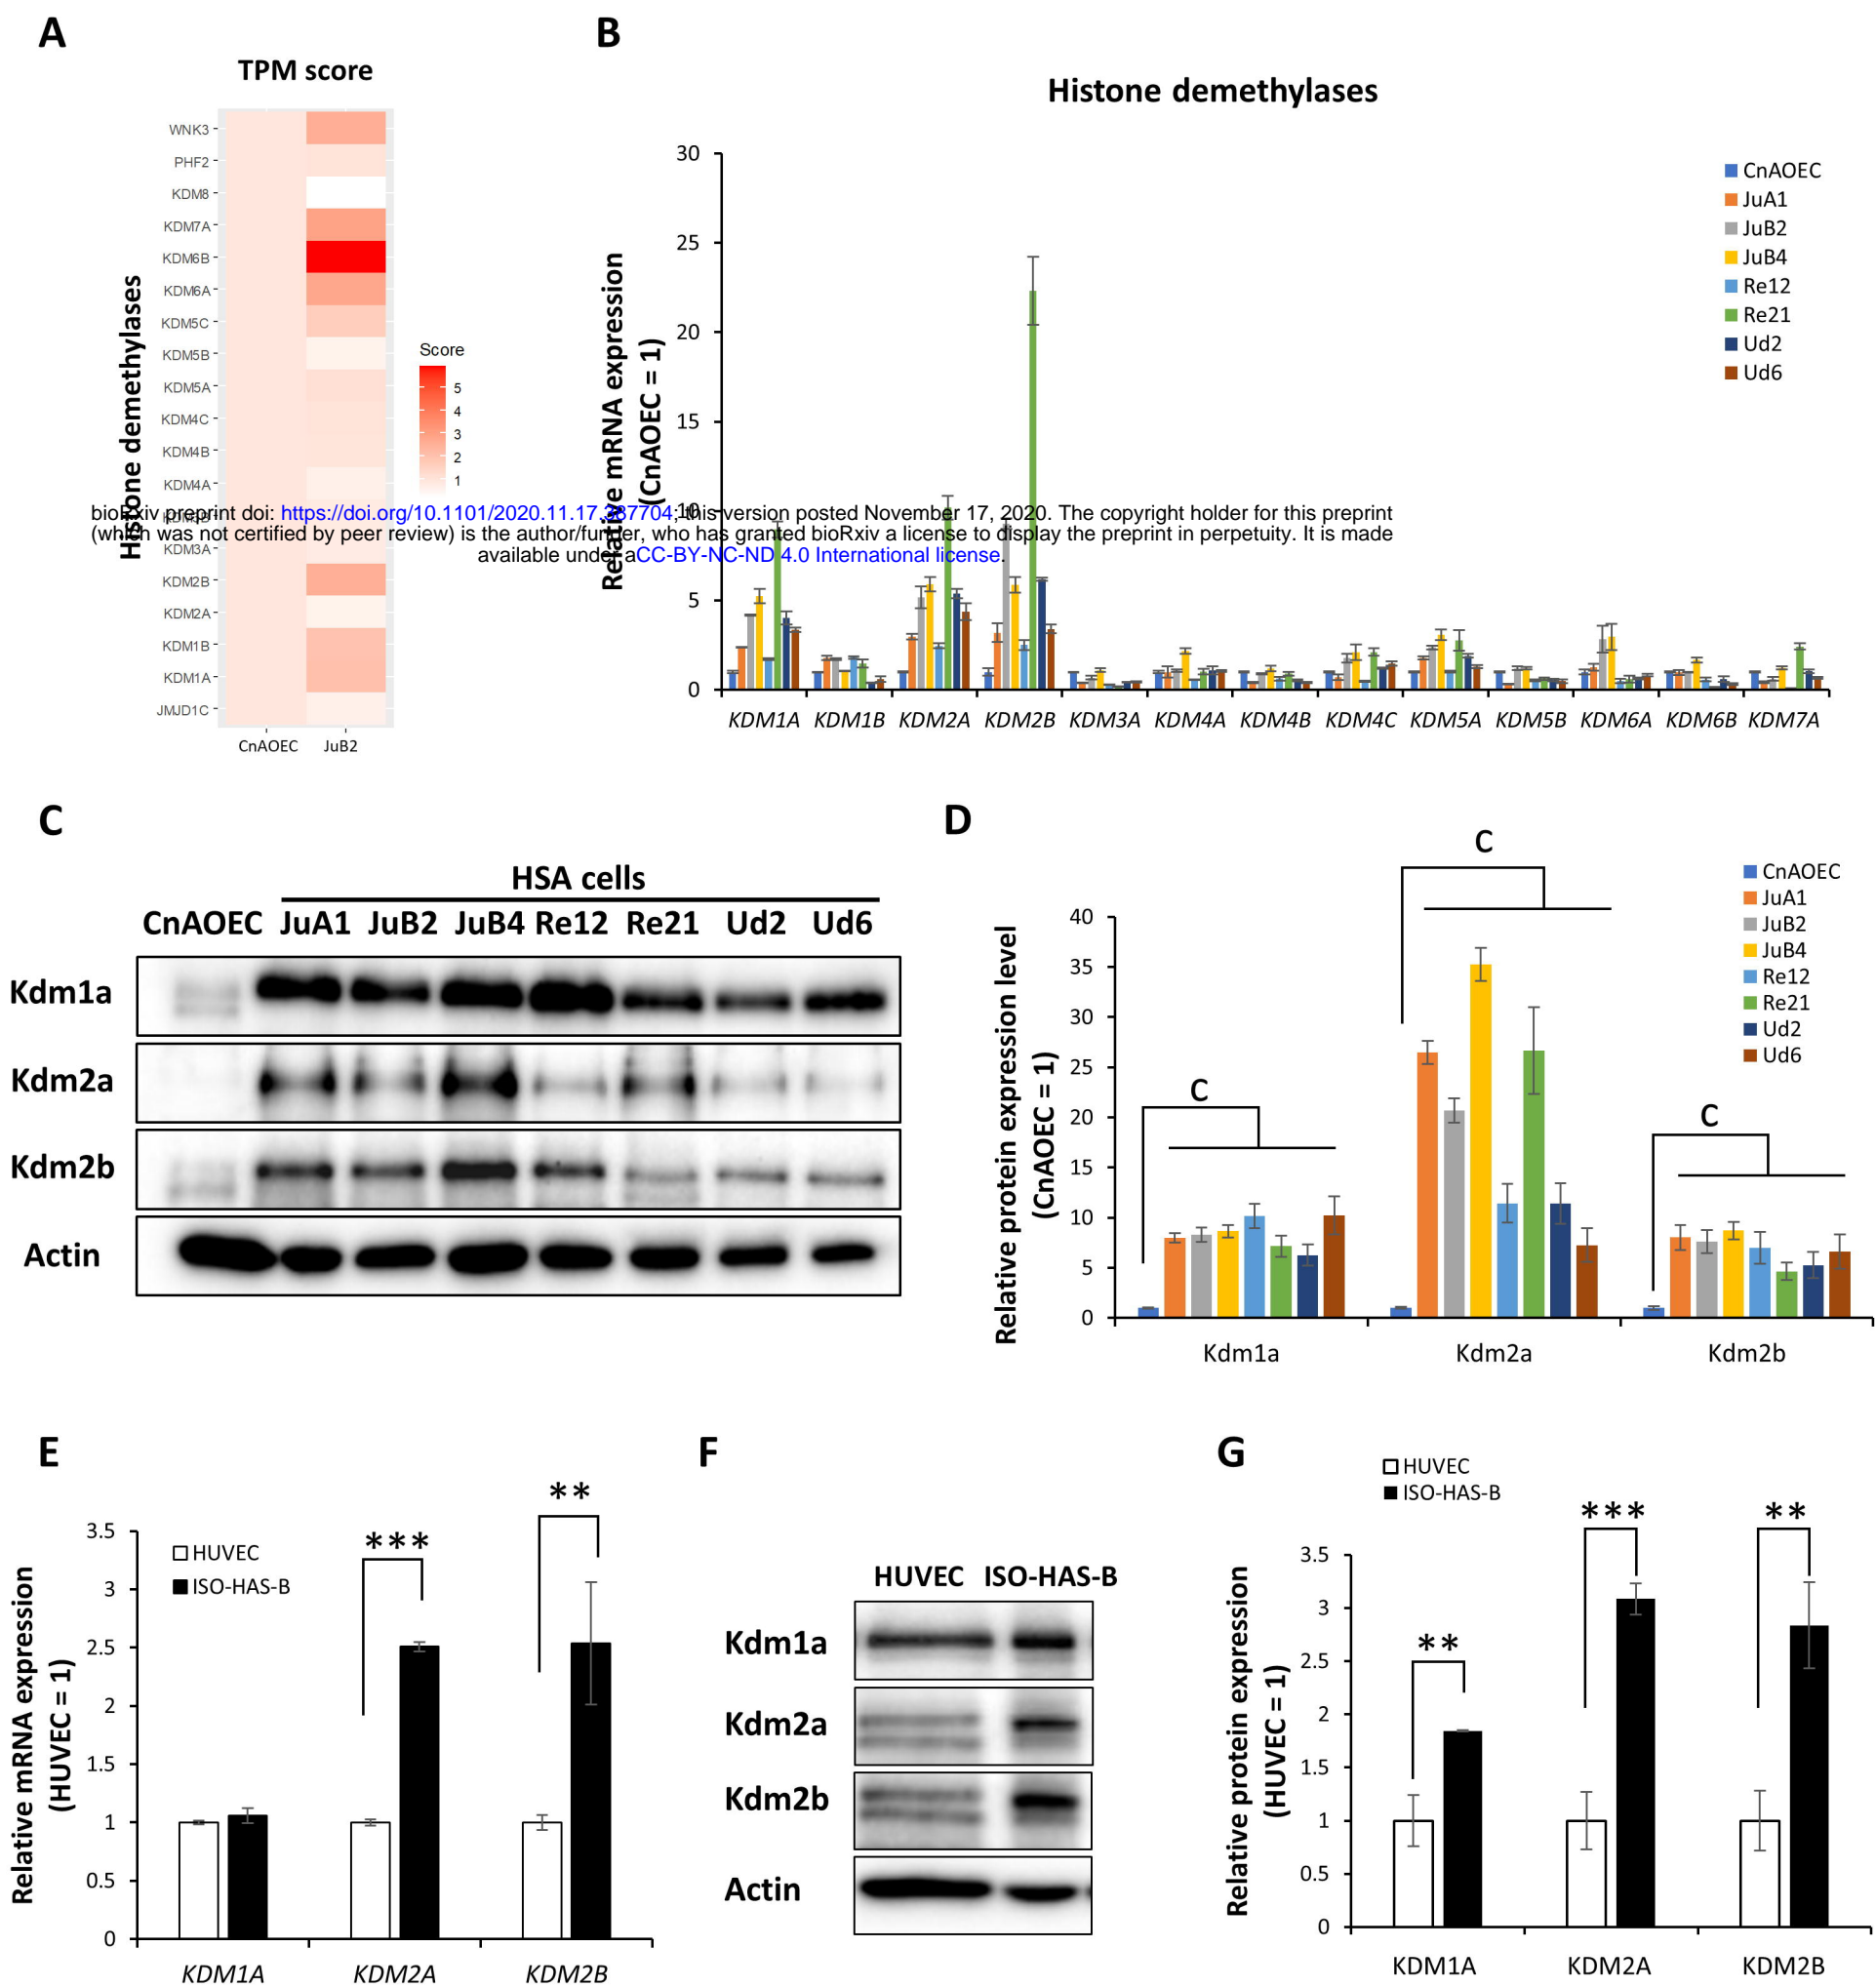

Fig. 1

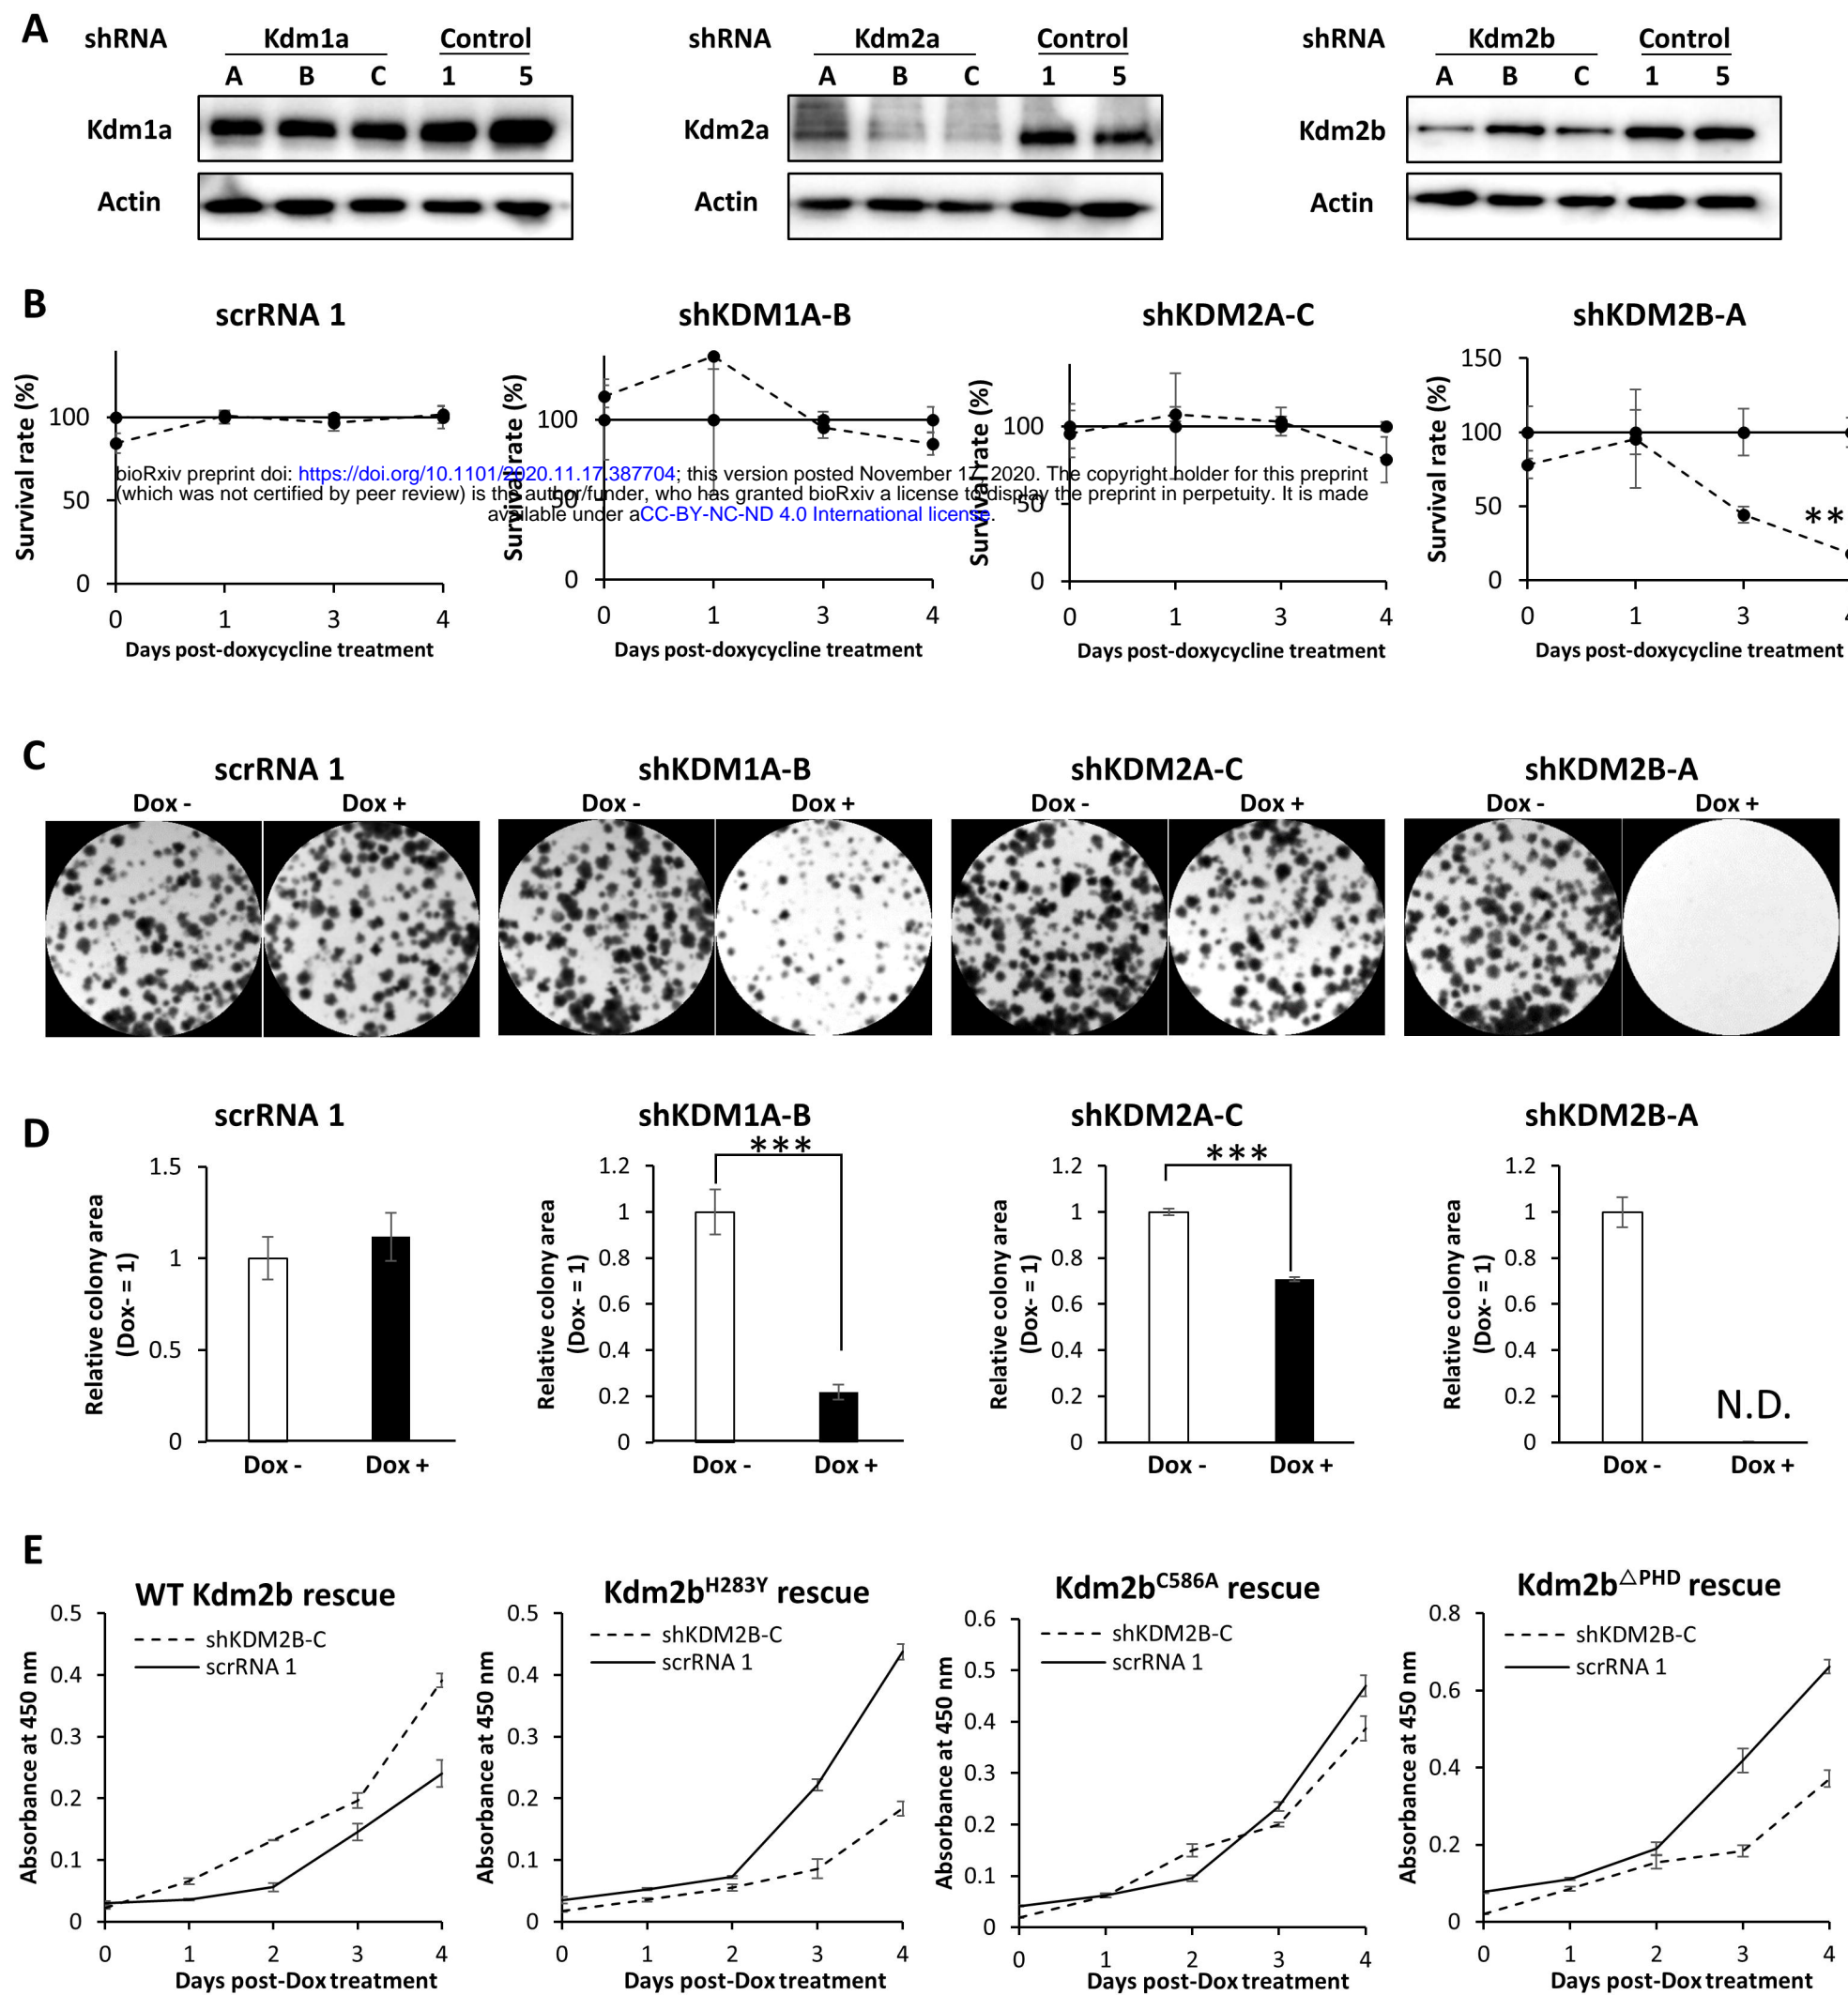

**Fig. 2**



**A**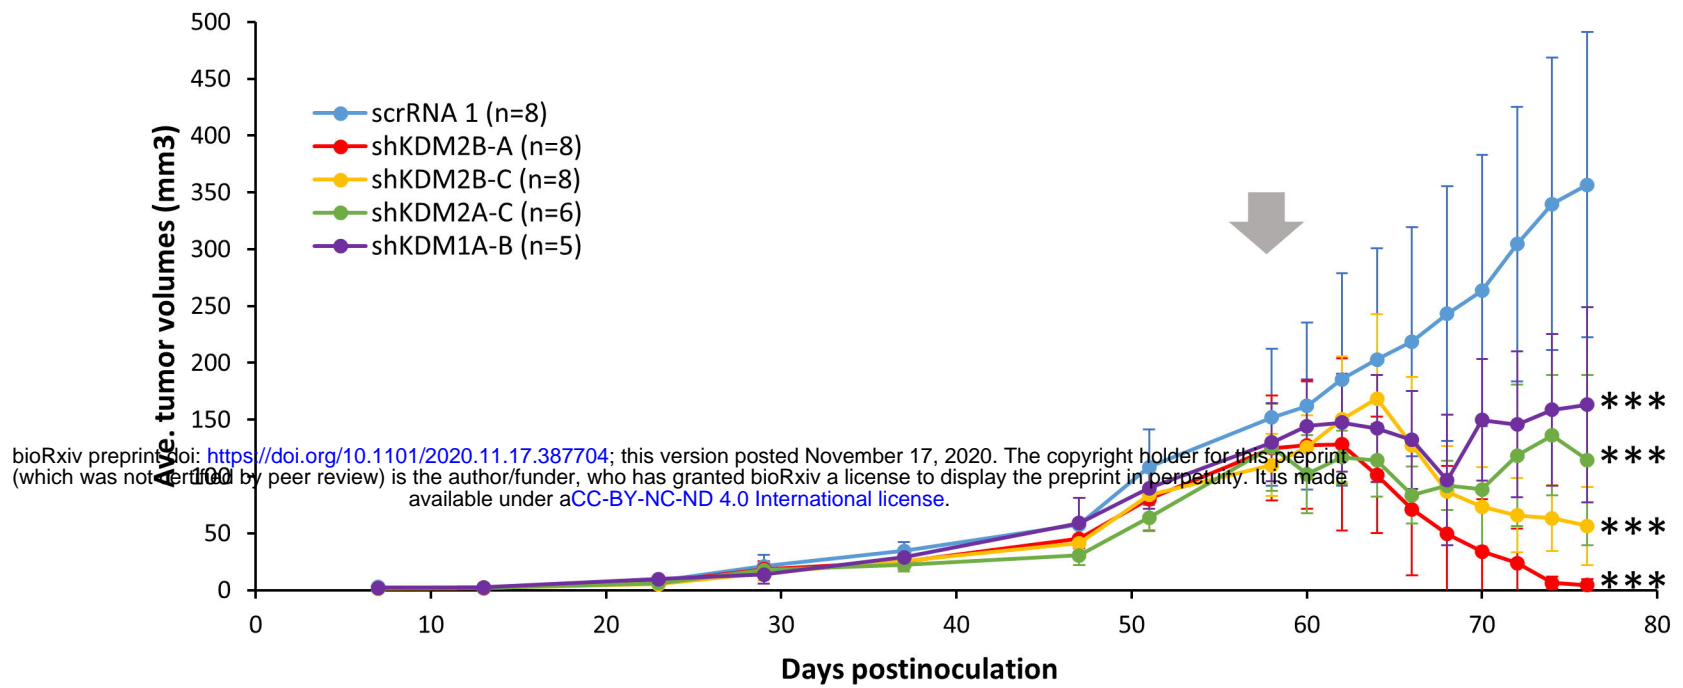**B**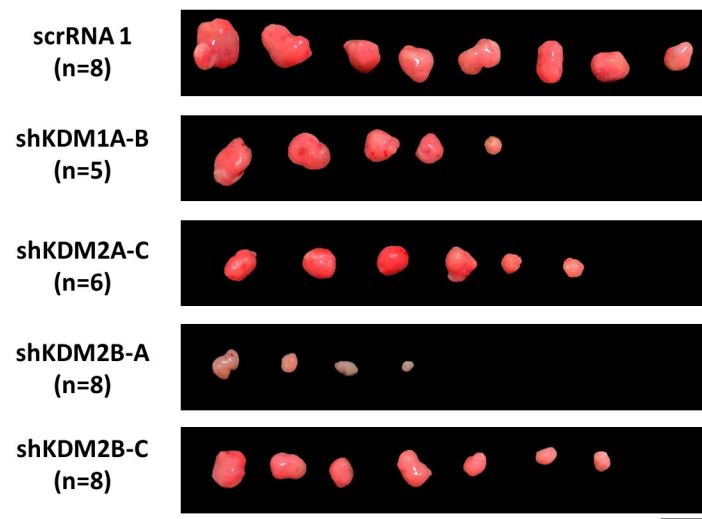**C**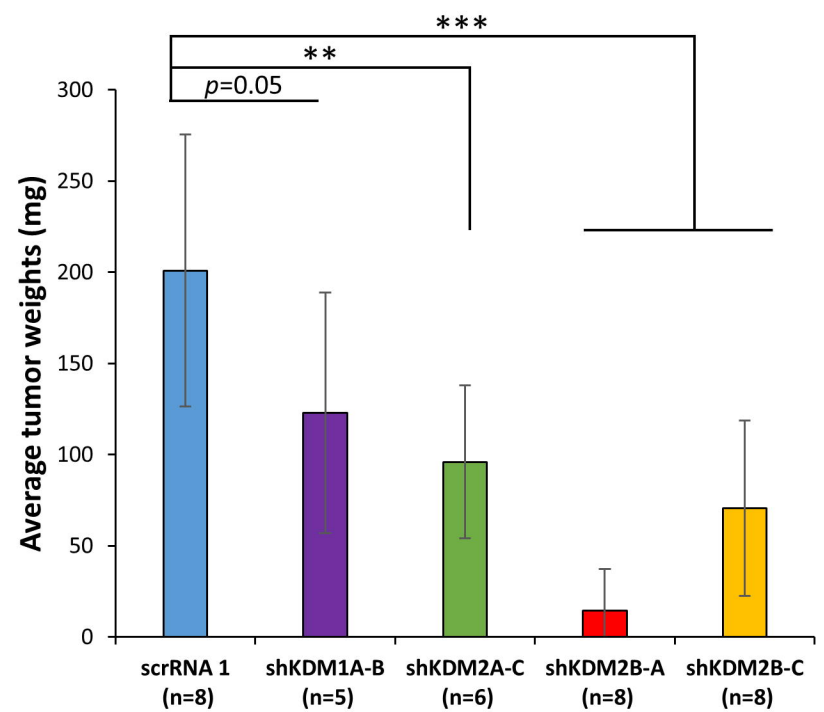**Fig. 3**



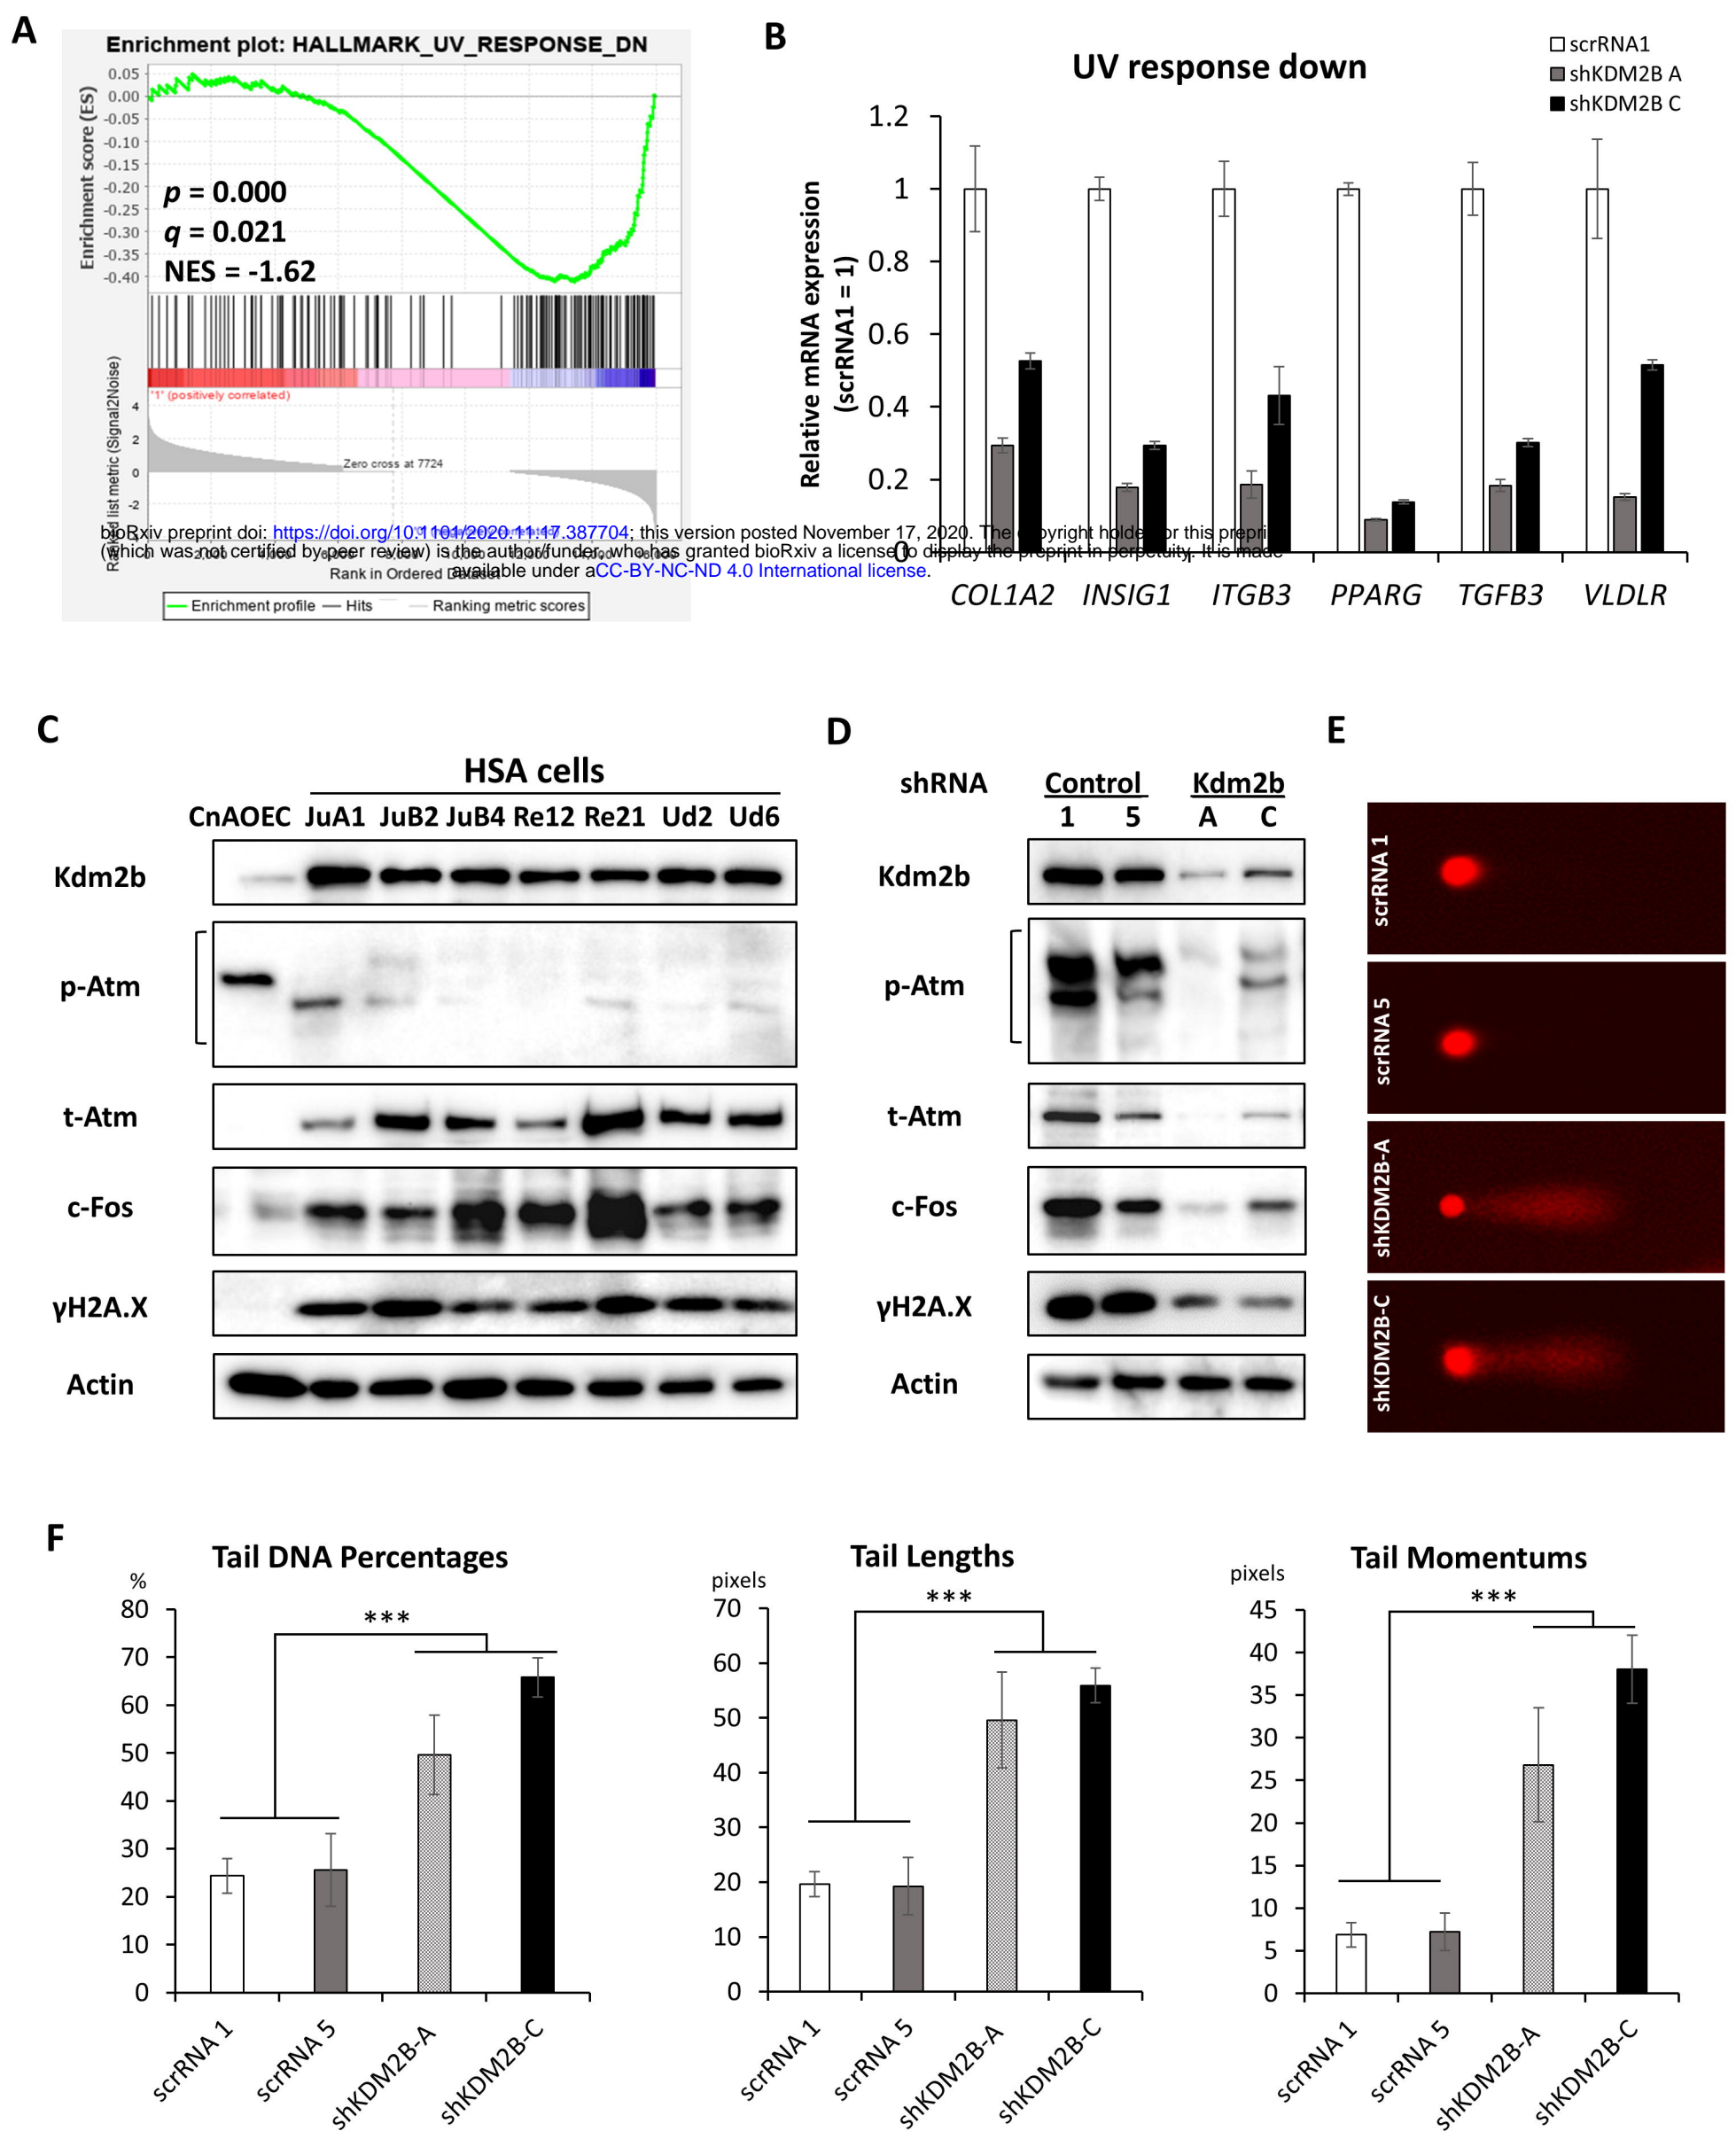

Fig. 4

**A**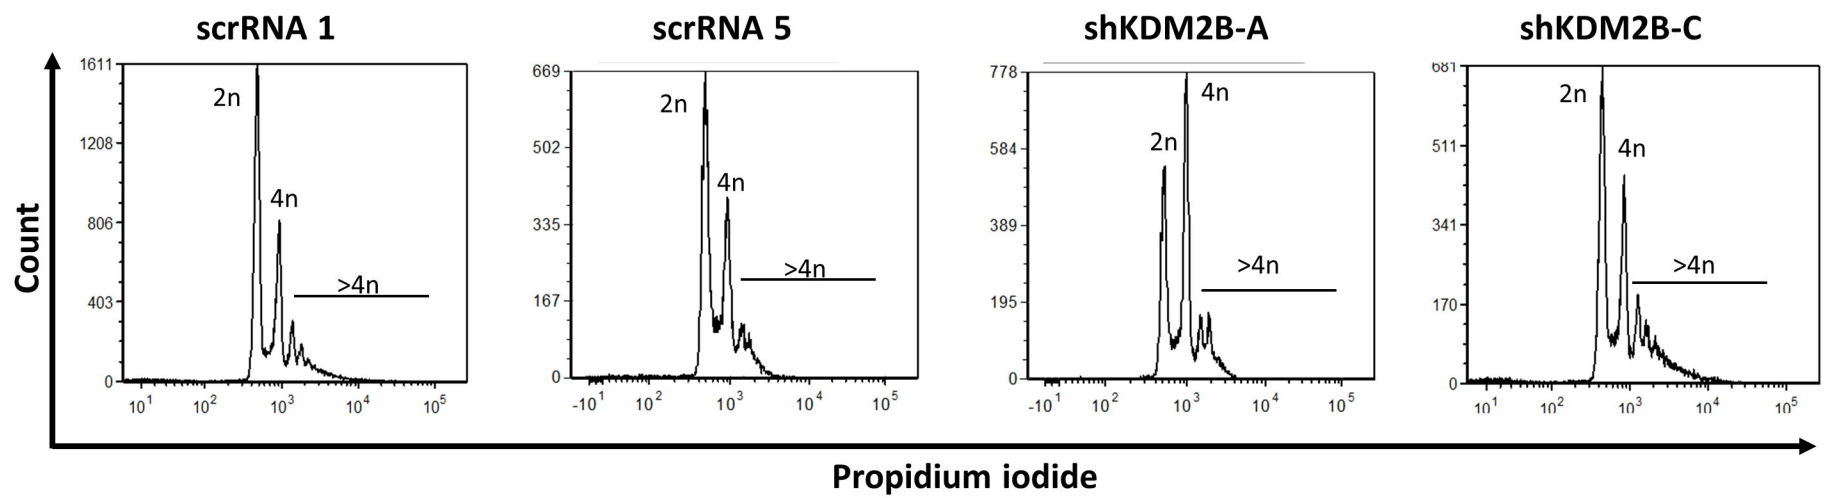

bioRxiv preprint doi: <https://doi.org/10.1101/2020.11.17.387704>; this version posted November 17, 2020. The copyright holder for this preprint (which was not certified by peer review) is the author/funder, who has granted bioRxiv a license to display the preprint in perpetuity. It is made available under aCC-BY-NC-ND 4.0 International license.

**B**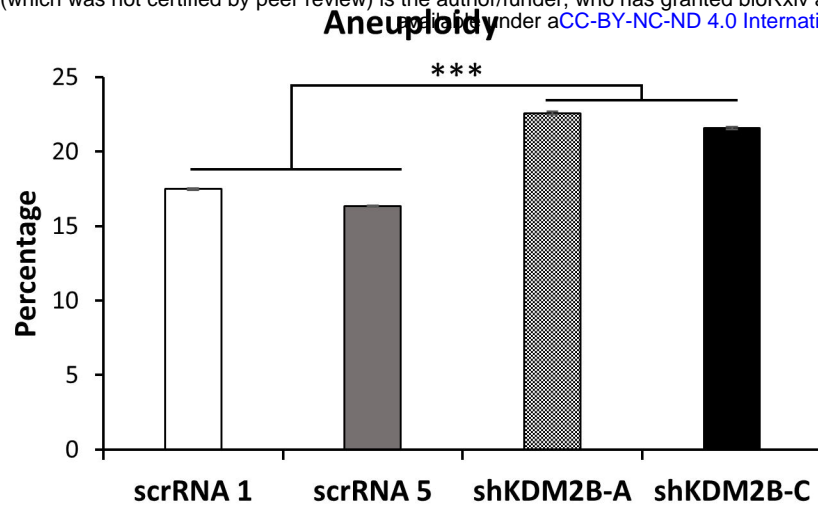**C**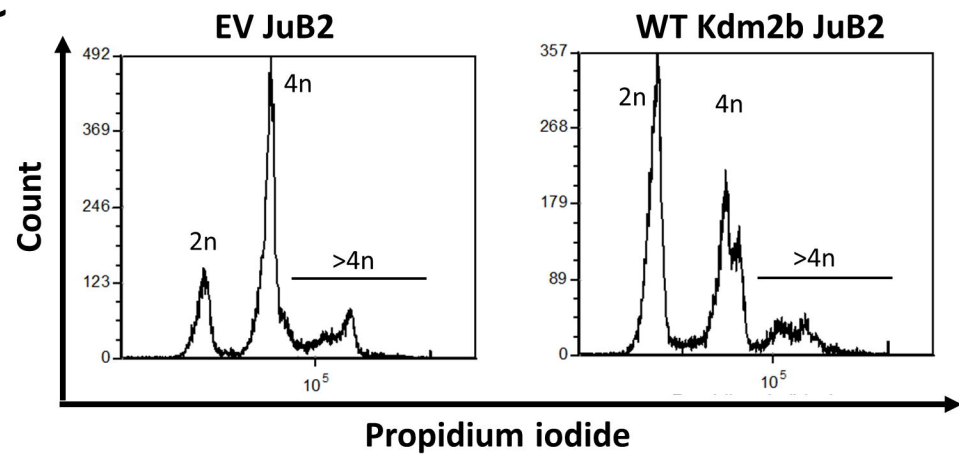**D**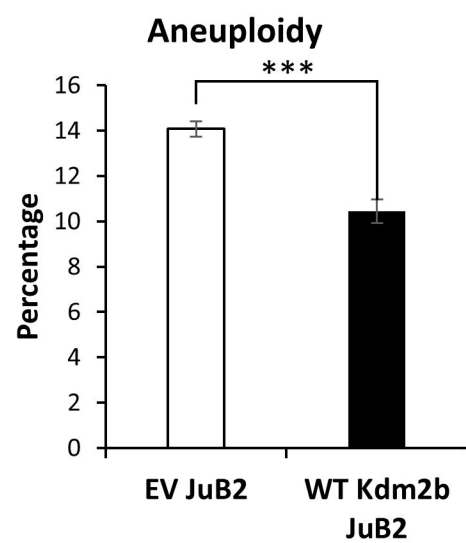**E**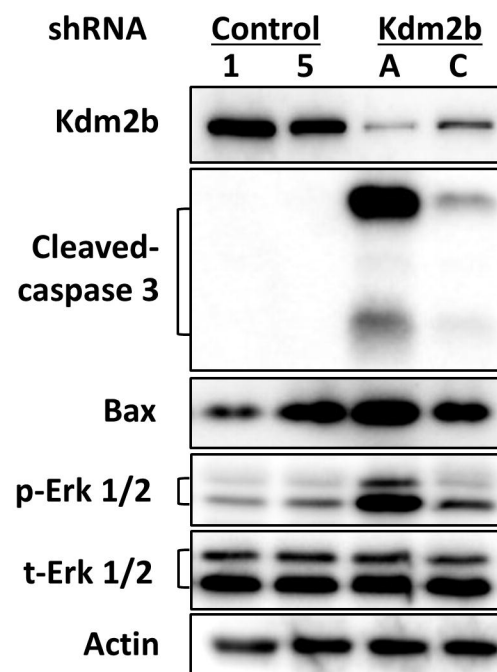**F**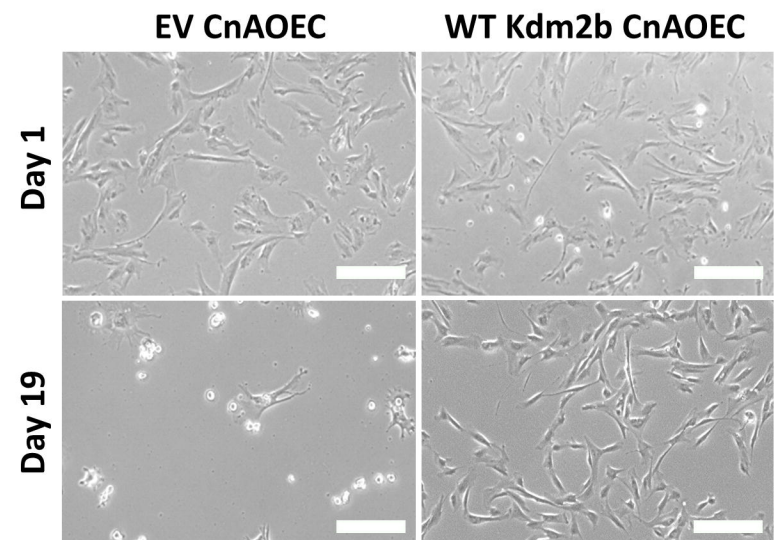**G**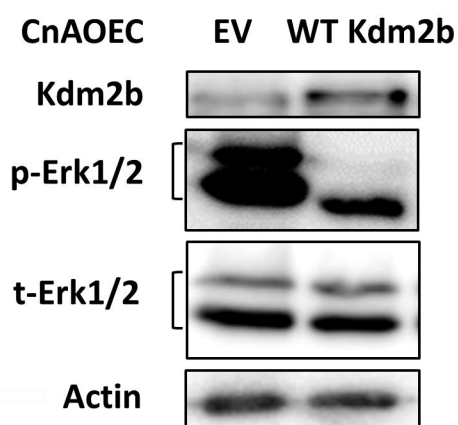**H**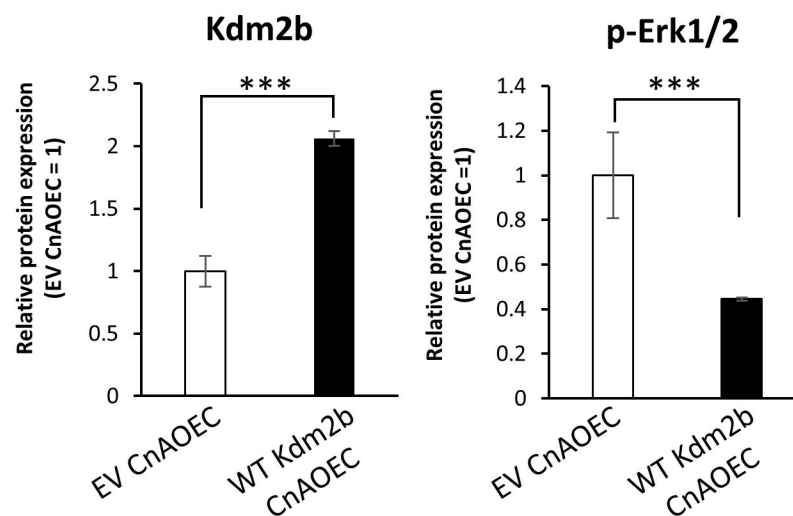**I**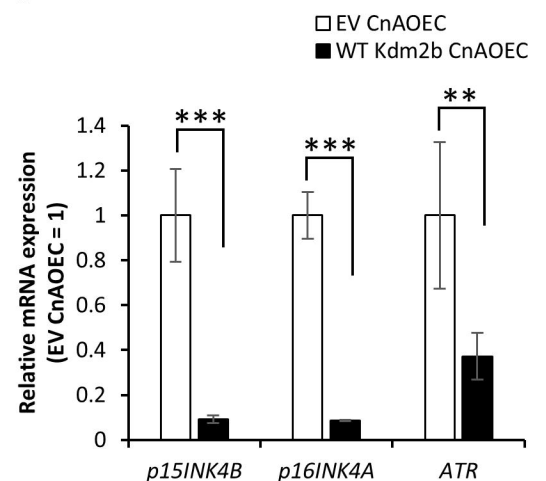

**Fig. 5**



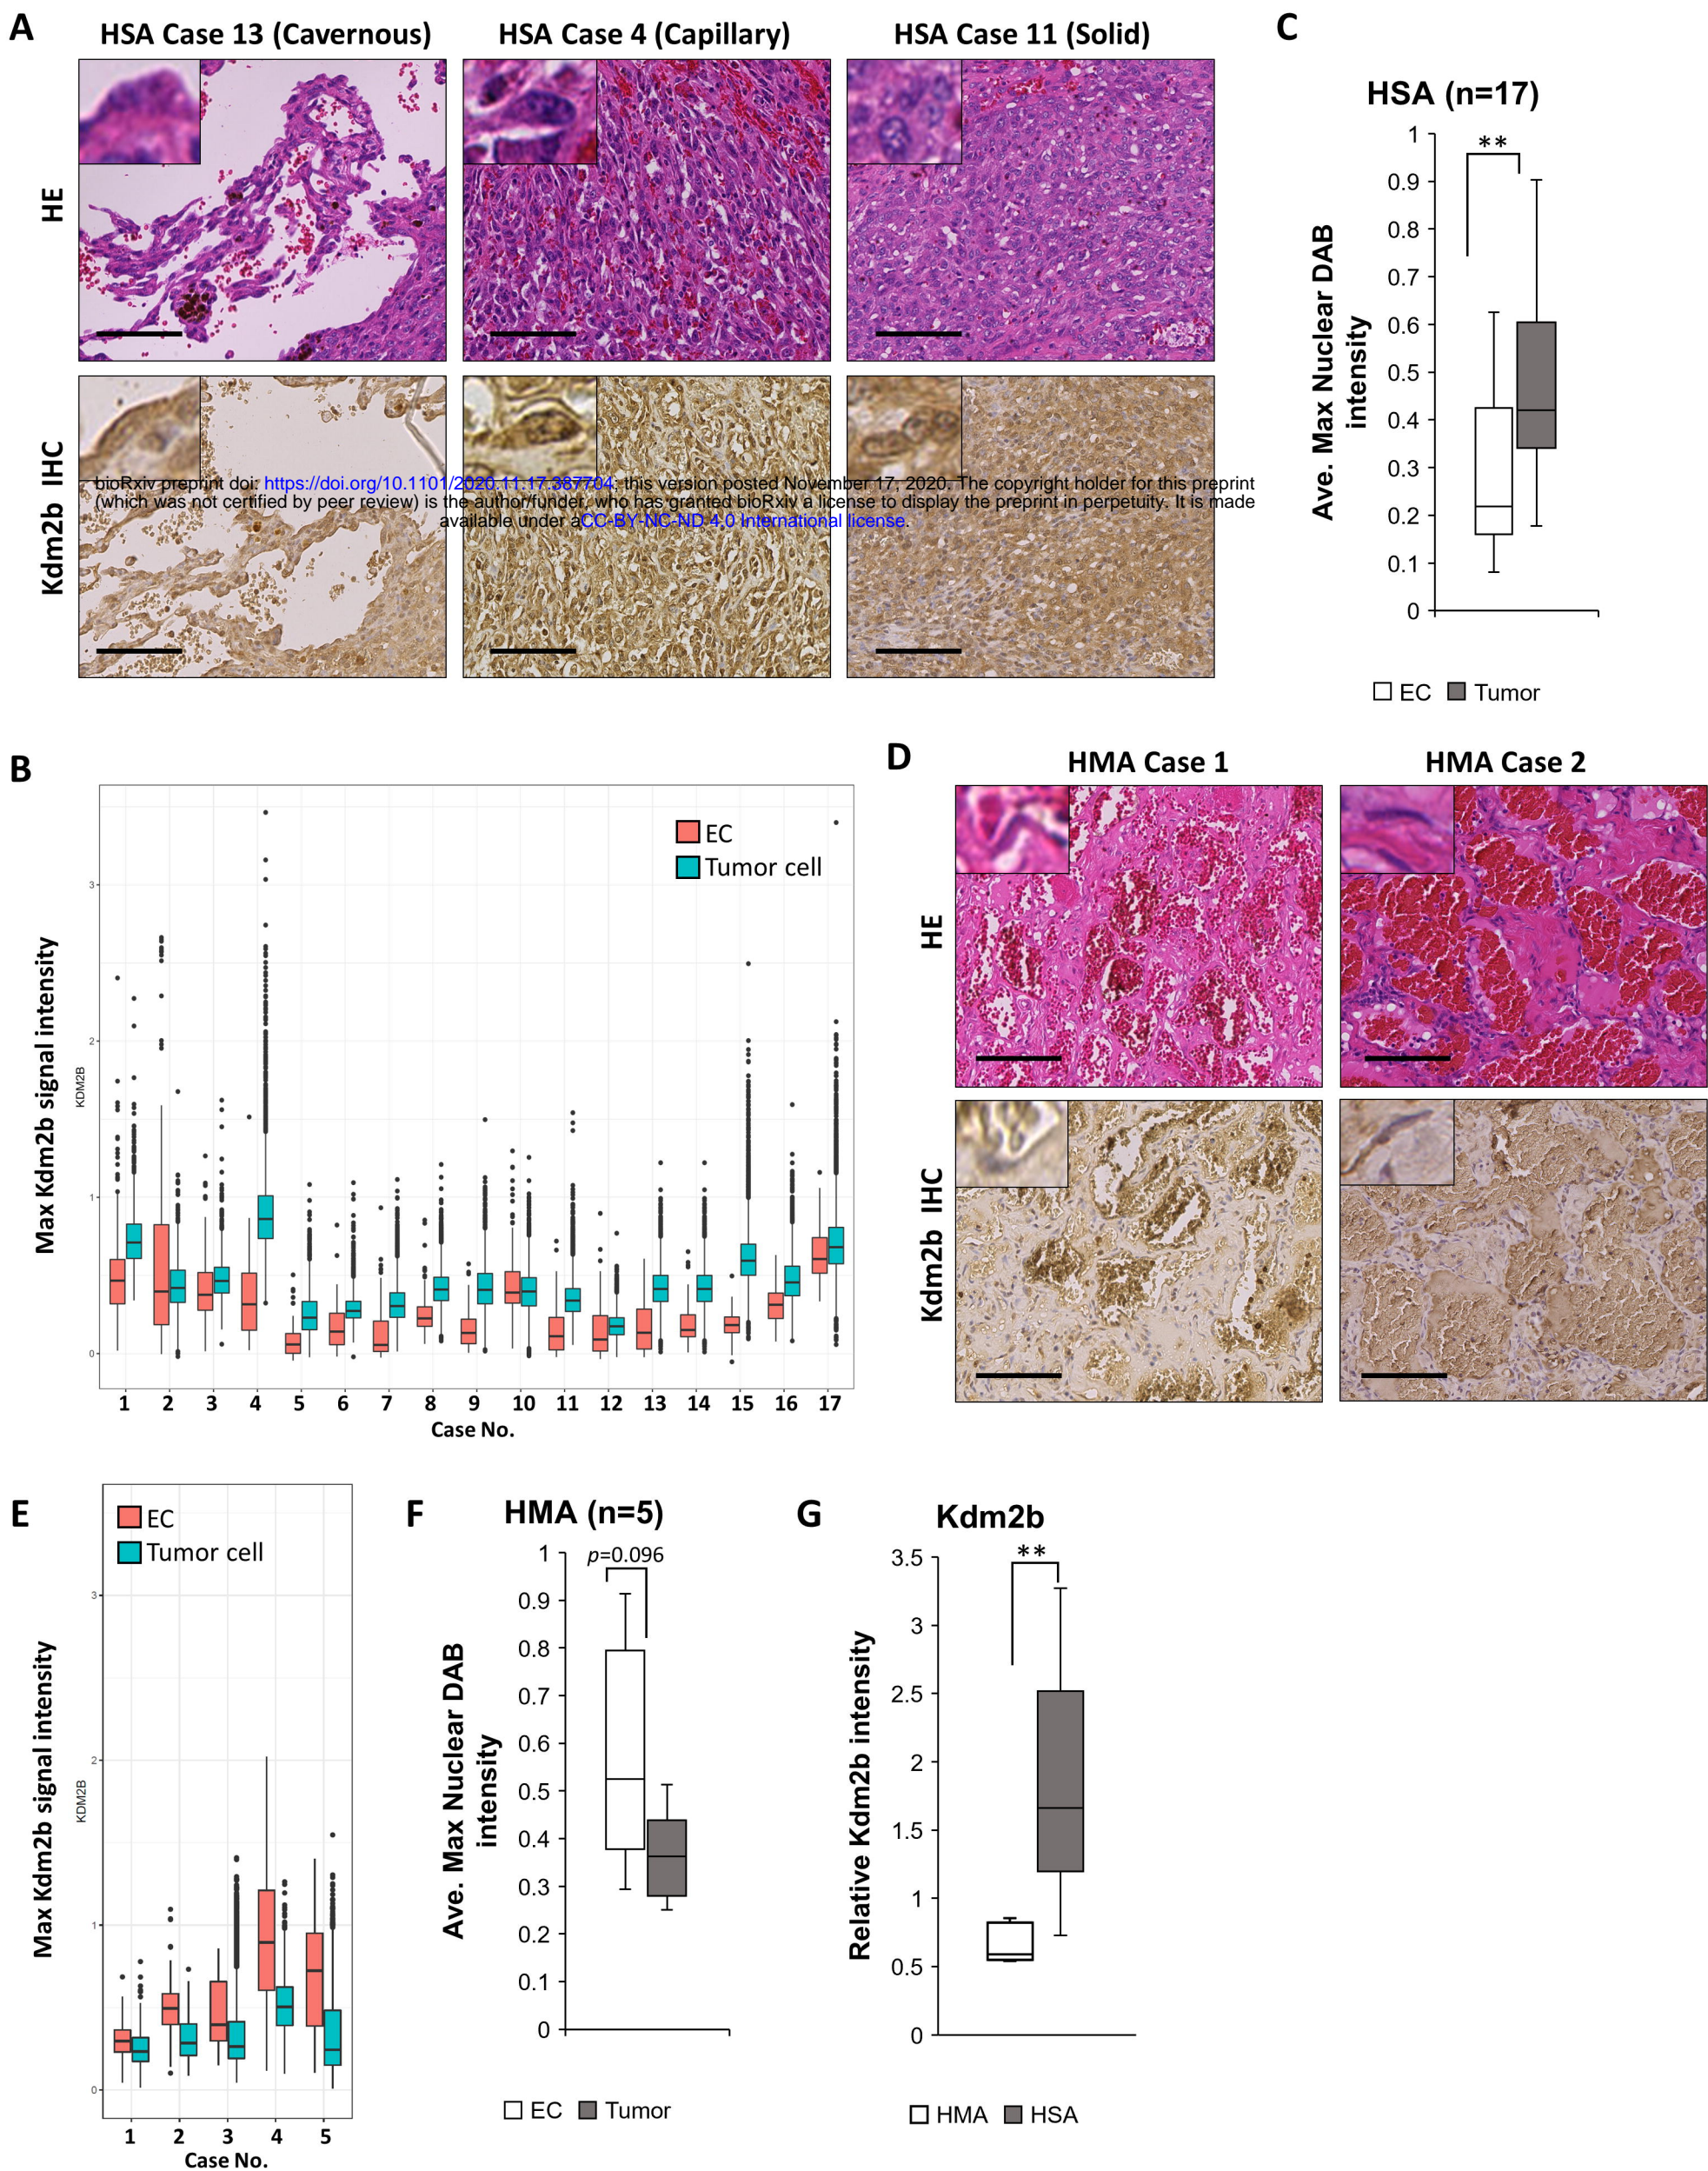

Fig. 6



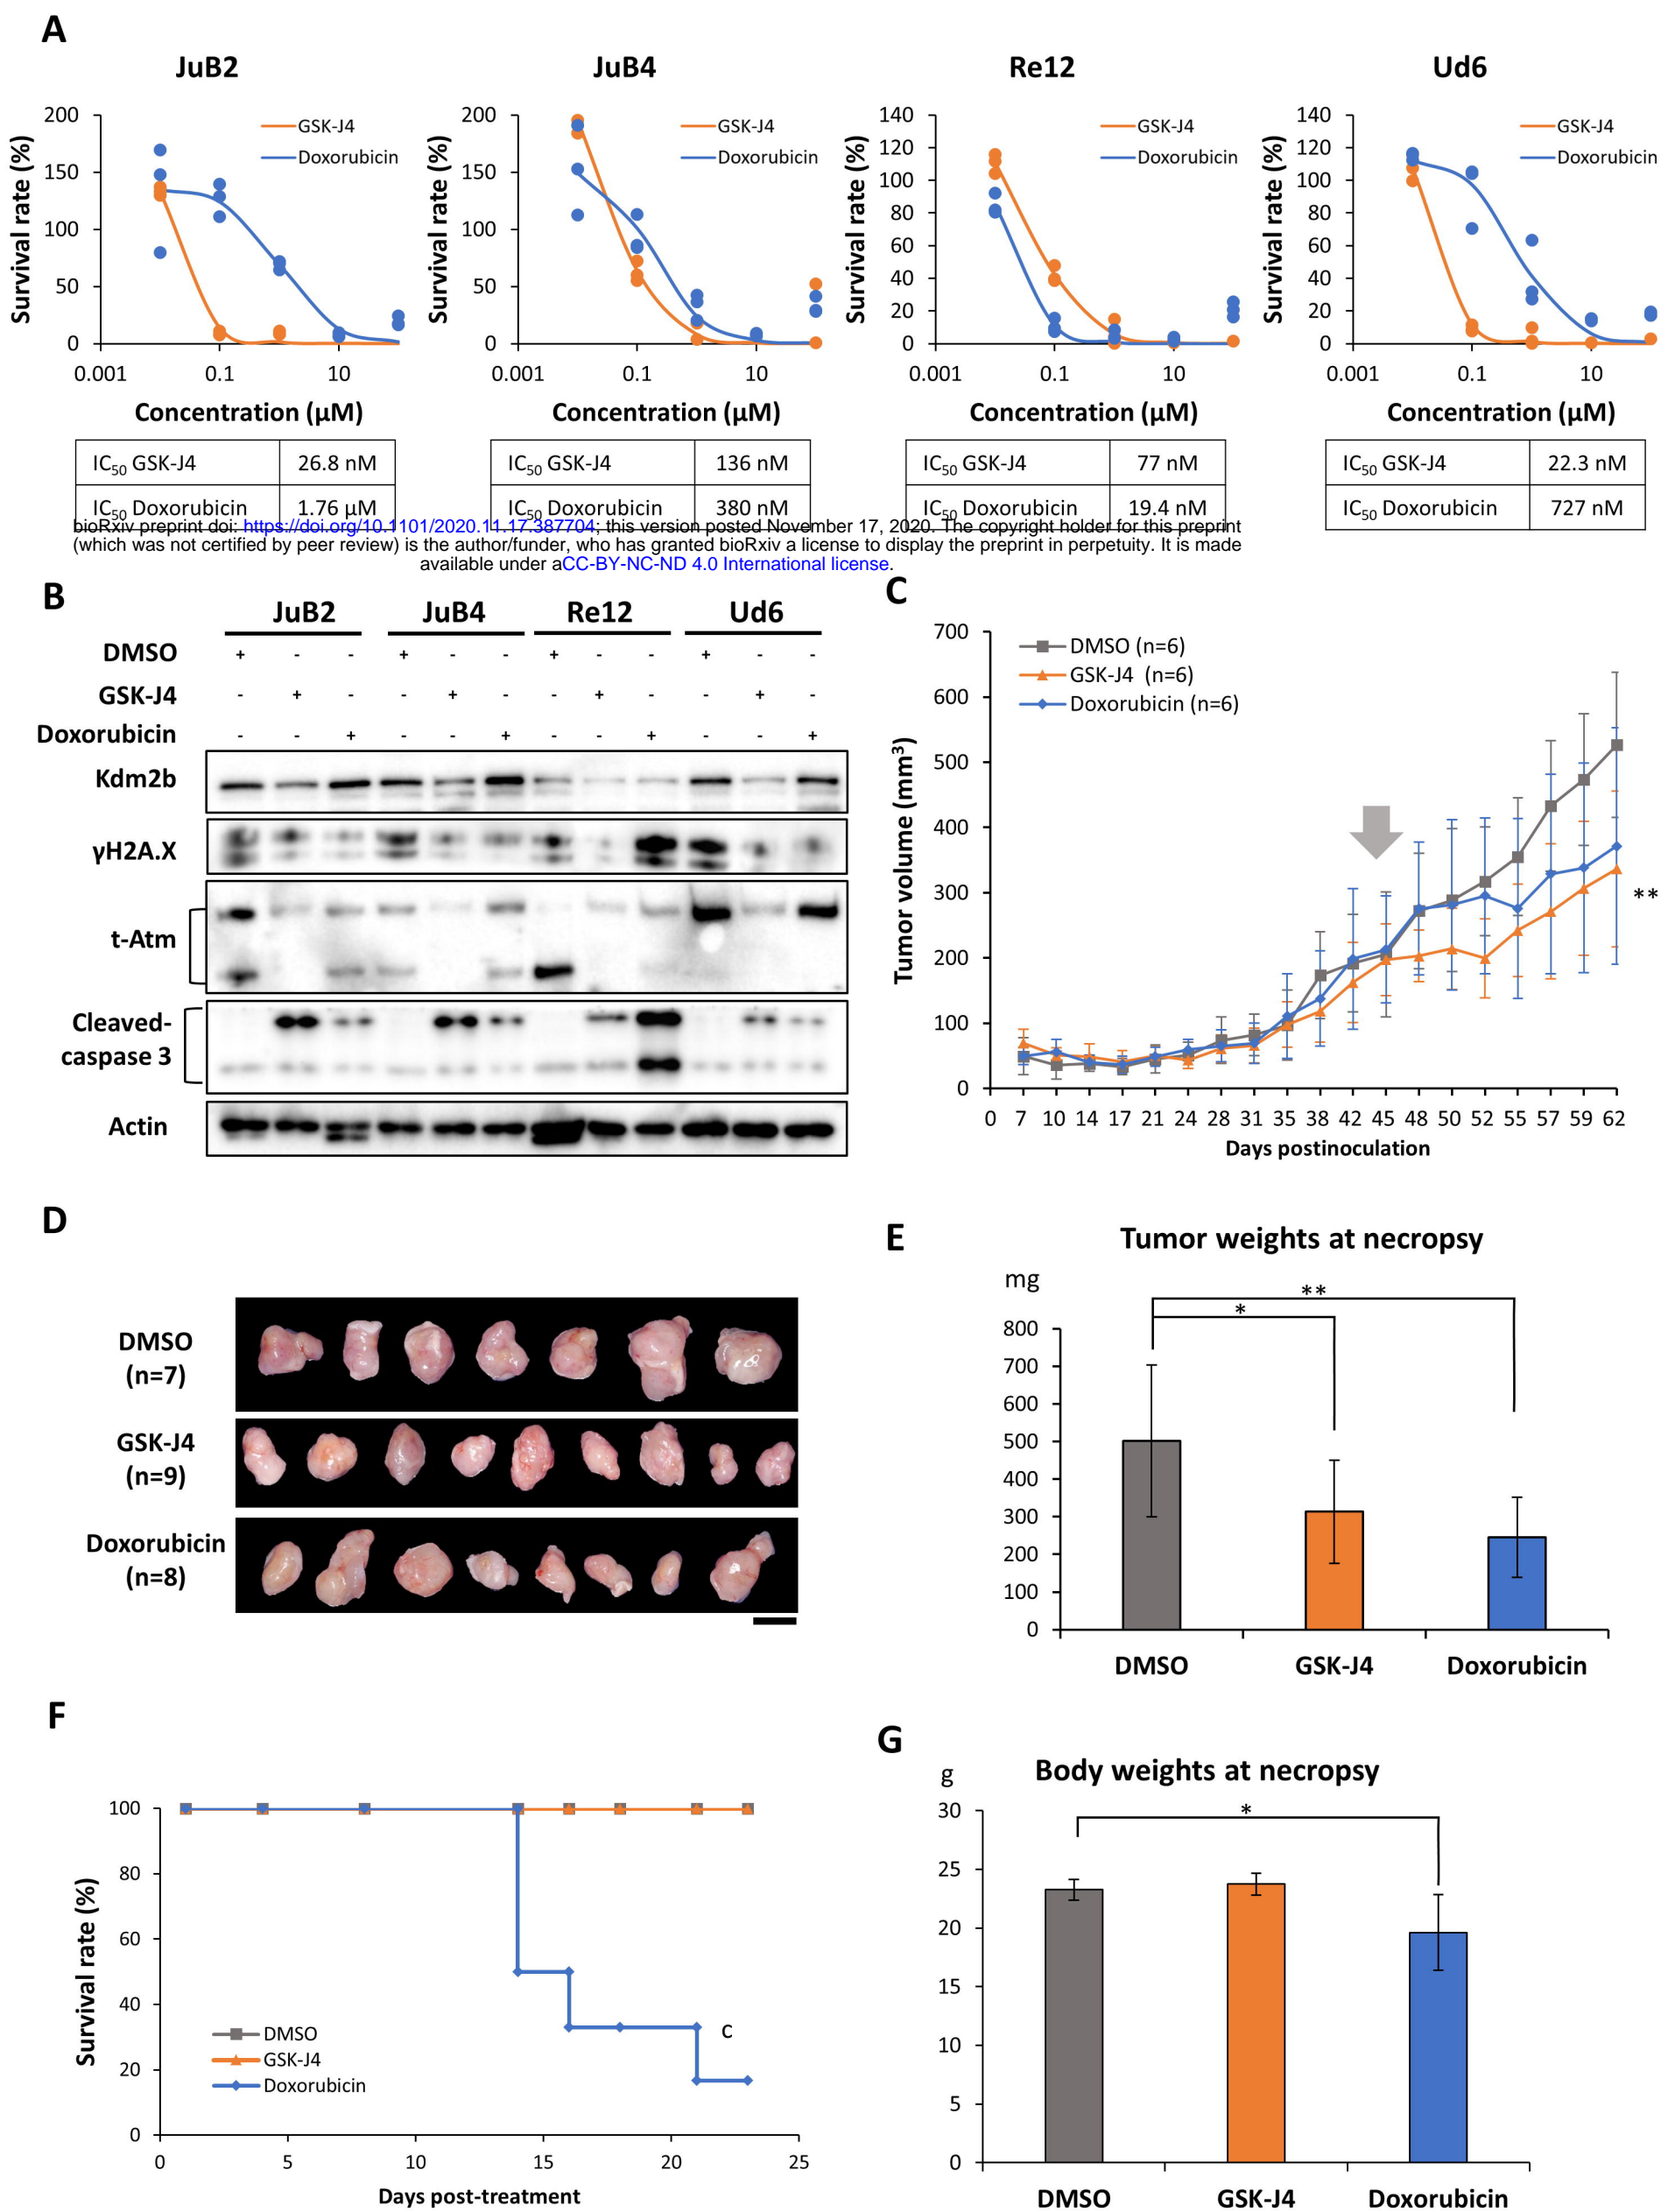

Source: https://www.biorxiv.org/content/10.1101/2020.11.17.387704v1.full.pdf
